# Supplementary material for: High-throughput gene targeting and phenotyping in zebrafish using CRISPR/Cas9
Source: HighWire-hosted journal article supplement (doi:10.1101/gr.186379.114), 2015-06-05
Supplement: Supplemental_File_1.docx [file Supplemental_File_1.docx]

**Supplementary File 1: Multiple sequence alignment of unique alleles generated by CRISPR/Cas9**

**Sequences in blue represent reference sequence**

**Target sequences are underlined**

**PAM sites are labeled in red**

***cdh23*-T1**

CCTCTCAGTTCTTCTCTATTGACGGAGCCAGAG---------------------------------------G---------------AATCGTCACTGTGACCAGAGCGCTGG

CCTCTCAGTTCCTCTCTATTGACGGAGCCACA----------------------------------------G---------------AATCGTCACTGTGACCAGAGCGCTGG

CCTCTCAGTTCTTCTCTATTGACGGAGCCAATTAATCGTTCTAGAGCCAATT------------------------------------AATCGTCACTGTGACCAGAGCGCTGG

CCTCTCAGTTCTTCTCTATTGACGGAGCCACA----------------------------------------G---------------AATCGTCACTGTGACCAGAGCGCTGG

CCTCTCAGTTCTTCTCTATTGACGGAGCCAGA----------------------------------------G---------------AATCGTCACTGTGACCAGAGCGCTGG

CCTCTCAGTTCTTCTCTATTGACGGAGCCAGAGCTGGACTATGAGACTATTGAATCTATACGATTCTCTATTG---------------AATCGTCACTGTGACCAGAGCGCTGG

CCTCTCAGTTCTTCTCTATTGACGGAGCCAGATAAAATACTGGCAGCCAGATAAAATACACAGT--------G---------------AATCGTCACTGTGACCAGAGCGCTGG

CCTCTCAGTTCTTCTCTATTGACGGAGCCAGATCGTAATC-----GTCACTGTCACTGTGTTCTTCTCTATTGACGGAGCCAGATCGTAATCGTCACTGTGACCAGAGCGCTGG

CCTCTCAGTTCTTCTCTATTGACGGAGCCAGT----------------------------------------G---------------AATCGTCACTGTGACCAGAGCGCTGG

***crym*–T1**

TTCTAAAAGGGACAGTTCAGAAATAATCCAGCC--------------TGTGAGATCTGTGGTCCCTATACAGCC

TTCTAAAAGGGACAGTTCAGAAATAATCC----------------------AGATCTGTGGTCCCTATACAGCC

TTCTAAAAGGGACAGTTCAGAAATAATCC--------------------AGAGATCTGTGGTCCCTATACAGCC

TTCTAAAAGGGACAGTTCAGAAATAATCC------------------AGTGAGATCTGTGGTCCCTATACAGCC

TTCTAAAAGGGACAGTTCAGAAATAATCCAGCCGT-------------GTGAGATCTGTGGTCCCTATACAGCC

TTCTAAAAGGGACAGTTCAGAAATAATCCAGCTGATCTGCTAATCCAATTGAGATCTGTGGTCCCTATACAGCC

TTCTAAAAGGGACAGTTCAGAAGTAATCCAGCTGATCTGCTAATCCAATTGAGATCTGTGGTCCCTATACAGCC

***coch-T1***

CCTTGCAGTCCGTGAACCTCCACTGGTCCACCA--------GACAGACCTATGATTCCTCTGGATGAA

CCTTGCAGTCCGTGAA-------------------------------CCTATGATTCCTCTGGATGAA

CCTTGCAGTCCGTGAACCTCCACTGGTCCA----------------------GATTCCTCTGGATGAA

CCTTGCAGTCCGTGAACCTCCACTGGTCCA------------------CTATGATTCCTCTGGATGAA

CCTTGCAGTCCGTGAACCTCCACTGGTCCA-----------------CCTATGATTCCTCTGGATGAA

CCTTGCAGTCCGTGAACCTCCACTGGTCCA---------------GACCTATGATTCCTCTGGATGAA

CCTTGCAGTCCGTGAACCTCCACTGGTCCACCA------------GACCTATGATTCCTCTGGATGAA

CCTTGCAGTCCGTGAACCTCCACTGGTCCACCA------------GGCCTATGATTCCTCTGGATGAA

CCTTGCAGTCCGTGAACCTCCACTGGTCCACCAAAAATAGTGACAGACCTATGATTCCTCTGGATGAA

CCTTGCAGTCCGTGAACCTCCACTGGTCCACCACATCTA--GACAGACCTATGATTCCTCTGGATGAA

CCTTGCAGTCCGTGAACCTCCACTGGTCCACCAGACCTA-TGACAGACCTATGATTCCTCTGGATGAA

CCTTGCAGTCCGTGAACCTCCACTGGTCCATCATAGGAA-TCACAGACCTATGATTCCTCTGGATGAA

***kars*-T1**

AGGCCTACGAAATAGACTTCACCCCTCCCTTCAGGCGAATCAGCATGACCCAAGAGCTGG

AGGCCTACGAAATAGACTT---------------GCGAATCAGCATGACCCAAGAGCTGG

AGGCCTACGAAATAGACTTCACCCCTAT-----------------TGACCCAAGAGCTGG

AGGCCTACGAAATAGACTTCACCCCTCCCTTC-----------AATGATA----------

AGGCCTACGAAATAGACTTCACCCCTCCCTTC----GAATCAGCATGACCCAAGAGCTGG

AGGCCTACGAAATAGACTTCACCCCTCCCTTC-GGCGAATCAGCATGACCCAAGAGCTGG

***col11A2*-T1**

TTACCATTGCTGCCAGCCTTAGCCTTCCCATTAGTGT--------CTTTACCATTTCCATTGCTCTTG

--------------------------------------------------------CCATTGCTCTTG

------------------------------------------------TACCATTTCCATTGCTCTTG

------------------------------------------------TCCCATTTCCATTGCTCTT-

------------------------------------------------TCCCATTTCCATTGCTCTTG

TTACCACTGCTGCCAGCCTTAGCCTTCCCATTATTGT--------CTTTACCATTTCCATTGCTCTTG

TTACCATTGCTGCCAGCCTTAGCCTTC-----------------------CCATTTCCATTGCTCTTG

TTACCATTGCTGCCAGCCTTAGCCTTCC-----------------CTTTACCATTTCCATTGCTCTTG

TTACCATTGCTGCCAGCCTTAGCCTTCC-----------------CTTTACCATTTCCATTGCTCTTT

TTACCATTGCTGCCAGCCTTAGCCTTCCCAT-----------------TACCATTTCCATTGCTCTTG

TTACCATTGCTGCCAGCCTTAGCCTTCCCAT-----------------TTCCATTTCCATTGCTCTTG

TTACCATTGCTGCCAGCCTTAGCCTTCCCATATGT----------CTTTACCATTTCCATTGCTCTTG

TTACCATTGCTGCCAGCCTTAGCCTTCCCATT-------------CTTTACCATTTCCATTGCTCTTG

TTACCATTGCTGCCAGCCTTAGCCTTCCCATTACCATGGTGC---CTTTACCATTTCCATTGCTCTTG

TTACCATTGCTGCCAGCCTTAGCCTTCCCATTACCATTTGT----CTTTACCATTTCCATTGCTCTTG

TTACCATTGCTGCCAGCCTTAGCCTTCCCATTACCTTA-------GCCTACCATTTCCATTGCTCTTG

TTACCATTGCTGCCAGCCTTAGCCTTCCCATTGT-----------CTTTACCATTTCCATTGCTCTTG

TTACCATTGCTGCCAGCCTTAGCCTTCCCATTTCCATTTCCATTTCTTTACCATTTCCATTGCTCTTG

TTACCATTGCTGCCAGCCTTAGCCTTCCCATTTCCATTTCCCTTTCTTTACCATTTCCATTGCTCTTG

TTACCATTGCTGCCAGCCTTAGTC----------------------TTTACCATTTCCATTGCTCTTG

TTACCGTTGCTGCCAGCATTAGACGGCCAATAAGTGG--------CATTCCCATTGCCAATGCTCTGG

TTACCGTTGCTGCCAGCCTTAGCCTTCCCATTAGTGC--------CTTTCCCATTTCCATTGCTCTTG

TTACCGTTGCTGCCAGCCTTAGCCTTCCCATTAGTGT--------CTCTCCCATTTCCATTGCTCTTG

TTATCGTTGCTGCCTGCCTTAGCCTCCCCATTAGTGT--------TTTTCCCATTTCCTTTGCTCTTG

***col11A2-*T2**

TGGGCTTCCTGTGCAGAGGCAACAGGTCCTTT--------CTCTCCAGCGCTCTGTCCAAAGCGGAAC

TGGGCTTCCTGTGCAGAGGCAACAGGTC---------------TCCAGCGCTCTGTCCAAAGCGGAAC

TGGGCTTCCTGTGCAGAGGCAACAGGTCC---------------------------------------

TGGGCTTCCTGTGCAGAGGCAACAGGTCC------------------------------AAGCGGAAC

TGGGCTTCCTGTGCAGAGGCAACAGGTCC--------------TCCAGCGCTCTGTCCAAAGCGGAAC

TGGGCTTCCTGTGCAGAGGCAACAGGTCC--------------TCCAGTGCTCTGTCCAAAGCGGAAC

TGGGCTTCCTGTGCAGAGGCAACAGGTCC-------------ATCCAGCGCTCTGTCCAAAGCGGAAC

TGGGCTTCCTGTGCAGAGGCAACAGGTCCTC------------TCCAGCGCTCTGTCCAAAGCGGAAC

TGGGCTTCCTGTGCAGAGGCAACAGGTCCTT------------TCCAGCGCTCTGTCCAAAGCGGAAC

TGGGCTTCCTGTGCAGAGGCAACAGGTCCTTC----------CTCCAGCGCTCTGTCCAAAGCGGAAC

TGGGCTTCCTGTGCAGAGGCAACAGGTCCTTT---------------GCGCTCTGTCCAAAGCGGAAC

TGGGCTTCCTGTGCAGAGGCAACAGGTCCTTT----------CTCCAGCGCTCTGTCCAAAGCGGAAC

TGGGCTTCCTGTGCAGAGGCAACAGGTCCTTT---------TCTCCAGCGCTCTGTCCAAAGCGGAAC

TGGGCTTCCTGTGCAGAGGCAACAGGTCCTTTCAACAGGTCTCTCCAGCGCTCTGTCCAAAGCGGAAC

TGGGCTTCCTGTGCAGAGGCAACAGGTCT-------------CTCCAGCGCTCTGTCCAAAGCGGAAC

***dfna5*-T1**

TACTAAAAGTGGAAGTGCTGTAGCA--GAACTTGGGCCAGGGACCATTAATATAGGTGGCTC

TACTAAAAGTGGAAGTGCTGTAGCACTTCCCTTGGGCCAGGGACCATTAATATAGGTGGCTC

***dfna5*-T2**

ACGCAAAGACGGAGGTGTTGGCGGTAG-----------------TGAAGGAACGAATCATTACCACTCAGCCCTGCA

ACGCAAAGAACGAA------------------------------CGAAGGAACGAATCATTACCACTCAGCCCTGCA

ACGCAAAGACGGA--------------------------------------ACGAATCATTACCACTCAGCCCTGCA

ACGCAAAGACGGAGGT-----------------------------------ACGAATCATTACCACTCAGCCCTGCA

ACGCAAAGACGGAGGT--TGAAGGAGGT----------------TGAAGGAACGAATCA-TACCACTCAGCCCTGCA

ACGCAAAGACGGAGGT--TGAAGGAGGT----------------TGAAGGAACGAATCATTACCACTCAGCCCTGCA

ACGCAAAGACGGAGGTCTTG--------------------------AAGGAACGAATCATTACCACTCAGCCCTGCA

ACGCAAAGACGGAGGTGGT---------------------------AAGGAACGAATCATTACCACTCAGCCCTGCA

ACGCAAAGACGGAGGTGTTGG-------------------------------CGAATCATTACCACTCAGCCCTGCA

ACGCAAAGACGGAGGTGTTGGCGG--------------------TGAAGGAACGAATCATTACCACTCAGCCCTGCA

ACGCAAAGACGGAGGTGTTGGCGGGAACGAATCGTTGGCGGGAACGAAGGAACGAATCATTACCACTCAGCCCTGCA

ACGCAAAGACGGAGGTGTTGGCGGTA----------------------GGAACGAATCATTACCACTCAGCCCTGCA

ACGCAAAGACGGAGGTGTTGGCGGTA-------------------GAAGGAACGAATCATTACCACTCAGCCCTGCA

ACGCAAAGACGGAGGTGTTGGCGGTA------------------TGAAGGAACGAATCATTACCACTCAGCCCTGCA

ACGCAAAGACGGAGGTGTTGGCGGTACA-------CGGAGGTGTTGGCGGAACGAATCATTACCACTCAGCCCTGCA

ACGCAAAGACGGAGGTGTTGGCGGTAG------------------GAAGGAACGAATCATTACCACTCAGCCCTGCA

ACGCAAAGACGGAGGTGTTGGCGGTAG-----------------GGAGGGAACGAATCATTACCACTCAGCCCTGCA

ACGCAAAGACGGAGGTGTTGGCGGTAGTAA-----TATTAATATTGAAGGAACGAATCATTACCACTCAGCCCTGCA

ACGCAAAGACGGAGGTGTTGGCGGTTGT----------------TGAAGGAACGAATCATTACCACTCAGCCCTGCA

ACGCAAAGACGGAGGTTTTG--------------------------AAGGAACGAATCATTACCACTCAGCCCTGCA

***espnl*-T1**

----------GGCTGCCAGGTTTGGCCATG---------------------------------------

CTCTGCATCTGGCTGCCAGGTTTGGCCATG----CGGAG-----GCAGTGCAGTGGCTGCTGTTTGAAG

CTCT----------------------------------------GCAGTGCAGTGGCTGCTGTTTGAAG

CTCTGCATCTGGCTGC-------------------GGAG-----GCAGTGCAGTGGCTGCTGTTTGAAG

CTCTGCATCTGGCTGCCAG---------------CGGAG-----GCAGTGCAGTGGCTGCTGTTTGAAG

CTCTGCATCTGGCTGCCAGGTAGTGCAGT------GGAG-----GCAGTGCAGTGGCTGCTGTTTGAAG

CTCTGCATCTGGCTGCCAGGTG------------CGGAGGCAGTGCAGTGCAGTGGCTGCTGTTTGAAG

CTCTGCATCTGGCTGCCAGGTTT------------GGAG-----GCAGTGCAGTGGCTGCTGTTTGAAG

CTCTGCATCTGGCTGCCAGGTTTG--------------------GCAGTGCAGTGGCTGCTGTTTGAAG

CTCTGCATCTGGCTGCCAGGTTTG----------CGGAG-----GCAGTGCAGTGGCTGCTGTTTGAAG

CTCTGCATCTGGCTGCCAGGTTTGGA-AGG----CGGAG-----GCAGTGCAGTGGCTGCTGTTTGAAG

CTCTGCATCTGGCTGCCAGGTTTGGAAGG-----CGGAG-----GCAGTGCAGTGGCTGCTGTTTGAAG

CTCTGCATCTGGCTGCCAGGTTTGGC---------GGAG-----GCAGTGCAGTGGCTGCTGTTTGAAG

CTCTGCATCTGGCTGCCAGGTTTGGC--------CGGAG-----GCAGTGCAGTGGCTGCTGTTTGAAG

CTCTGCATCTGGCTGCCAGGTTTGGCAGT---------------GCAGTGCAGTGGCTGCTGTTTGAAG

CTCTGCATCTGGCTGCCAGGTTTGGCAGTGCAAACGGAG-----GCAGTGCAGTGGCTGCTGTTTGAAG

CTCTGCATCTGGCTGCCAGGTTTGGCCGAG-----GCAG-----GCAGTGCAGTGGCTGCTGTTTGAAG

CTCTGCATCTGGCTGCCAGGTTTGGCCGAGTTTGCGGAG-----GCAGTGCAGTGGCTGCTGTTTGAAG

***espn*-T2**

----------GGATCTGGGCATACGGGATC------------------------------

TAAATGGAGTGGATCTGGGCATACGGGATCAGGATGGGTTCTCAGCAGCGGATCTAGCTG

TA-ATGGAGTGTATCTGGGCATACGGGATCAGGATGGGTTCTCAGCAGCGGATCTAGCTG

TAAATGCAGTGGATCTGGGCATACGGGTTCAGGATGGGTTCTCAGCAGCGGATCTAGCTG

TAAATGGAGTGGAACTGGGCATACGGGATCAGGATGGGTTCTCAGCAGCGGATCTAGCTG

TAAATGGAGTGGATCTGGGCATACGGGATCAGGATGGGCTCTCAGCAGCGGATCTAGCTG

TAAATGGAGTGGATCTGGGCATACGGGATCAGGATGGGGTCTCAGCAGCGGATCTAGCTG

TAAATGGAGTGGATCTGGGCATACGGGGTCAGGATGGGTTCTCAGCAGCGGATCTAGCTG

TAAATGGAGTGGATCTGGGCGTACGGGATCAGGATGGGTTCTCAGCAGCGGATCTAGCTG

TAAATGGAGTGGGTCGGGGCATGCGGGATCAGGATGGGTTCTCAGCAGCGGATCTAGCTG

TAAATGGGGTGGATCTGGGAATACGGGATGAGGATGGGTTCTCAGCAGCGGATCTAGCTG

TAGATGGAGTGGATCTGGGCATACGGGATCAGGATGGGTTCTCAGCAGCGGATCTAGCTG

***espnl*-T2**

AGGCCTCGTTCACAGACCTGGATCTGTCCTGTC--A-GGATAAGAATGGAGCCACAGCACTAC

AGGCCTCGTTCACAGACCTGGATCTATCCTG--------ATAAGAATGGAGCCACAGCACTAC

AGGCCTCGTTCACAGACCTGGATCTGTCCT-----------AAGAATGGAGCCACAGCACTAC

AGGCCTCGTTCACAGACCTGGATCTGTCCTG-------------TCTGGAGCCACAGCACTAC

AGGCCTCGTTCACAGACCTGGATCTGTCCTG----------TAGAATGGAGCCACAGCACTAC

AGGCCTCGTTCACAGACCTGGATCTGTCCTG---------TAAGAATGGAGCCACAGCACTAC

AGGCCTCGTTCACAGACCTGGATCTGTCCTG---------TCAGAATGGAGCCACAGCACTAC

AGGCCTCGTTCACAGACCTGGATCTGTCCTG---------TCTGAATGGAGCCACAGCACTAC

AGGCCTCGTTCACAGACCTGGATCTGTCCTG--------ATAAGAATGGAGCCACAGCACTAC

AGGCCTCGTTCACAGACCTGGATCTGTCCTG-------GATAAGAATGGAGCCACAGCACTAC

AGGCCTCGTTCACAGACCTGGATCTGTCCTG------TCATAAGAATGGAGCCACAGCACTAC

AGGCCTCGTTCACAGACCTGGATCTGTCCTGAGACCTGGATCTGTCCTGAGCCACAGCACTAC

AGGCCTCGTTCACAGACCTGGATCTGTCCTGTCA----GATAAGAATGGAGCCACAGCACTAC

AGGCCTCGTTCACAGACCTGGATCTGTCCTGTCA-A-GGATAAGAATGGAGCCACAGCACTAC

AGGCCTCGTTCACAGACCTGGATCTGTCCTGTCATA-GGATAAGAATGGAGCCACAGCACTAC

***grhl2b*-T1**

CACTCAACACGGATCACCAGGACAAT----------AAACGGGAACAGTACAGCGTGCCGGCTGGAGAGA

CACTCAACACGGATCACCAG-----------------------AACAGTACAGCGTGCCGGCTGGAGAGA

CACTCAACACGGATCACCAGG------------------CGGGAACAGTACAGCGTGCCGGCTGGAGAGA

CACTCAACACGGATCACCAGGA--------------------------TCCAGCGTGCCGGCTGGAGAGA

CACTCAACACGGATCACCAGGA---------------------AACAGTACAGCGTGCCGGCTGGAGAGA

CACTCAACACGGATCACCAGGAC-----------------GGGAACAGTACAGCGTGCCGGCTGGAGAGA

CACTCAACACGGATCACCAGGACAAA------------ACGGGAACAGTACAGCGTGCCGGCTGGAGAGA

CACTCAACACGGATCACCAGGACAAT--------------GGGAACAGTACAGCGTGCCGGCTGGAGAGA

CACTCAACACGGATCACCAGGACAAT------------ACGGGAACAGTACAGCGTGCCGGCTGGAGAGA

CACTCAACACGGATCACCAGGACAAT-----------AACGGGAACAGTACAGCGTGCCGGCTGGAGAGA

CACTCAACACGGATCACCAGGACAAT----------AAACGGGAACAGTACAGCGCGCCGGCTGGAGAGA

CACTCAACACGGATCACCAGGACAATACACAGTACAAAACGGGAACAGTACAGCGTGCCGGCTGGAGAGA

CACTCAACACGGATCACCAGGACACC------AGGACAACGGGAACAGTACAGCGTGCCGGCTGGAGAGA

***grhl2b*-T2**

AAATTGCATACAACGCTGTGTCTTTCACCTGGGACCTGAACGAGGAGGCCAAGGTAAGCC

----------------------------------TATGAACGAGGAGGCCAAGGTAAGCC

------------------------TCACCTGGGACCTGAACGAGGAGGCCAAGGTAAGCC

AAATTGCATACAACGCTG------CGTCTTTTCACCTGAACGAGGAGGCCAAGGTAAGCC

AAATTGCATACAACGCTG------TGTCCTTTCACCTGAACGAGGAGGCCAAGGTAAGCC

***grhl2A-T1***

ACCTCTGGCTTTACAGTGGCCACTACACCGTCCTCGGCAGGCACTGTGCCGAACAGGTCT

ACCTCGGGCTTTACAGTGGCCACTACACCGTCCTCGGCAGGCACTGTGCCGAACAGGTCT

ACCTCTGGCTTTACAGTGGCCACTACAC------CGGCAGGCACTGTGCCGAACAGGTCT

ACCTCTGGCTTTACAGTGGCCACTACACCGT---CGGCAGGCACTGTGCCGAACAGGTCT

ACCTCTGGCTTTACAGTGGCCACTACACTA----CGGCAGGCACTGTGCCGAACAGGTCT

***grhl2A*-T2**

CTTTACTGATGGGATG-ACGAAGGCCCT----------------------------------------TGTTGGCCCCGGTCTCACTGAGTGTGATGCCAT

CTTTACTGATGAGAAG--------------------------------------------------------GCCTCAGGTCTCACTGAGTGTGATGCCAT

CTTTACTGATGGGAAG--------------------------------------------------------GCCTCAGGTCTCACTGAGTGTGATGCCAT

CTTTACTGATGGGATG---------------------------------------------------------GCCCCGGTCTCACTGAGTGTGATGCCAT

CTTTACTGATGGGATG-A--------------------------------------------------TGTTGGCCCCGGTCTCACTGAGTGTGATGCCAT

CTTTACTGATGGGATG-AC-------------------------------------------------TGTTGGCCCCGGTCTCACTGAGTGTGATGCCAT

CTTTACTGATGGGATG-ACGAA--------------------------------------------------GGCCCCGGTCTCACTGAGTGTGATGCCAT

CTTTACTGATGGGATG-ACGAA--------------------------------------------------GGCCCT-GTCTCACTGAGTGTGATGCCAT

CTTTACTGATGGGATG-ACGAA--------------------------------------------------GGCCTTGGTCTCACTGAGTGTGATGCCAT

CTTTACTGATGGGATG-ACGAAGGCCC-----------------------------------------TGTTGGCCCCGGTCTCACTGAGTGTGATGCCAT

CTTTACTGATGGGATG-ACGAAGGCCCCCATCAGTATGTATGTATGTATGTACCGGGGCCAACATGTATGTTGGCCCCGGTCTCACTGAGTGTGATGCCAT

CTTTACTGATGGGATG-ACGAAGGCCCCTGGGA--------------------------------TGATGTTGGCCCCGGTCTCACTGAGTGTGATGCCAT

CTTTACTGATGGGATG-ACGAAGGCCCTC---------------------------------------TGTTGGCCCCGGTCTCACTGAGTGTGATGCCAT

CTTTACTGATGGGATG-ACGAAGGTTT--------------------------------------GTTTGTTGGCCCCGGTCTCACTGAGTGTGATGCCAT

CTTTACTGATGGGATGTAC-------------------------------------------------TGTTGGCCCCGGTCTCACTGAGTGTGATGCCAT

***hgfa*-T1**

ATTCCAGTCTTTGTGAATGACCTTCTCCCCTT--------------------------------------GTAGTTGACACCTGACCCAATGATGCAC

ATTCCAGTCTTTGTGAACGACCTTCTCCCC--------------------------------------------TTGACACCTGACCCAATGATGCAC

ATTCCAGTCTTTGTGAACGACCTTCTCCCC------------------------------------------GAACGACACCTGACCCAATGATGCAC

ATTCCAGTCTTTGTGAACGACCTTCTCCCCCT----------------------------------------AGTTGACACCTGACCCAATGATGCAC

ATTCCAGTCTTTGTGAACGACCTTCTCCCCTT----------------------------------------GGTTGACACCTGACCCAATGATGCAC

ATTCCAGTCTTTGTGAACGACCTTCTCCCCTT--------------------------------------GTAGTTGACACCTGACCCAATGATGCAC

ATTCCAGTCTTTGTGAACGACCTTCTCCCCTTAAGTATTTCGACCTTCTTCCCCTTAAGTATCCCCTTAAGTAGTTGACACCTGACCCAATGATGCAC

ATTCCAGTCTTTGTGAACGACCTTCTCCCCTTG--------------TTGACACCTGACCCAATGATGCACTCGTTGACACCTGACCCAATGATGCAC

ATTCCAGTCTTTGTGAATGACCT-------------------------------------------------AGTTGACACCTGACCCAATGATGCAC

ATTCCAGTCTTTGTGAATGACCTTCTCCCCCT----------------------------------------AGTTGACACCTGACCCAATGATGCAC

ATTCCAGTCTTTGTGAATGACCTTCTCCCCTT--------------------------------------------GACACCTGACCCAATGATGCAC

ATTCCAGTCTTTGTGAATGACCTTCTCCCCTT-----------------------------------------GTTGACACCTGACCCAATGATGCAC

***hgfa*-T2**

ACCTGCAGGGGTCACGTTGACTGTACCCCTGTA---GC-CCTCTCCTTGACCCCGAAAACAAGA

ACCTGCA--------------------------------CCTCTCCTTGACCCCGAAAACAAGA

ACCTGCAGGGGTCACGTTGA-------------------CCTCTCCTTGACCCCGAAAACAAGA

ACCTGCAGGGGTCACGTTGA--------CTGTA---------CCCCTTGACCCCGAAAACAAGA

ACCTGCAGGGGTCACGTTGA--------CTGTA----C-CCTCTCCTTGACCCCGAAAACAAGA

ACCTGCAGGGGTCACGTTGA--------CTGTA---CC-CCTCTCCTTGACCCCGAAAACAAGA

ACCTGCAGGGGTCACGTTGA--------CTGTA---CC-CCTGTCCTTGACCCCGAAAACAAGA

ACCTGCAGGGGTCACGTTGA--------CTGTA---CGGAGACTCCTTGACCCCGAAAACAAGA

ACCTGCAGGGGTCACGTTGA--------CTGTG----A-CCTCTCCTTGACCCCGAAAACAAGA

ACCTGCAGGGGTCACGTTGACTGTACCCCTGTA---GGCCCTCTCCTTGACCCCGAAAACAAGA

ACCTGCAGGGGTCACGTTGAGGTCACACCTGCAGGGGC-CCTCTCCTTGACCCCGAAAACAAGA

***hgfb*-T1**

AGTCATTGTTGGTGTGAGCATAAATGG-------------CAGAGGATGTGCCAGGCATAACCGACCAGCCAT

AGTCATTGTTG-----------------------------------ATGTGCCAGGCATAACCGA--------

AGTCATTGTTGGGGTGAGCATAAATGG-------------CAGAGGATGTGCCAGGCATAACCGA-CAGCCAT

AGTCATTGTTGGTGTAAGCATAAATGG----------------GGGATGTGCCAGGCAAAACCGACCAGCCAT

AGTCATTGTTGGTGTGAGAATAAA-------------------GGGAAGAGCCAGGCAAAACCGACCAGCCAT

AGTCATTGTTGGTGTGAGCATAAAT-------------------GGATGTGCCAGGCATAACCGACCAGCCAT

AGTCATTGTTGGTGTGAGCATAAATGG--------------------------------------------AT

AGTCATTGTTGGTGTGAGCATAAATGG--------------------------------AATAAA--------

AGTCATTGTTGGTGTGAGCATAAATGG--------------GGAGGATGTGCCAGGCATAACCGACCAGCCAT

AGTCATTGTTGGTGTGAGCATAAATGG-------------CAGAGGATGTGCCAGGCATAACCGACCG-----

AGTCATTGTTGGTGTGAGCATAAATGGGGATTTATGTGCCAGGAGGATGTGCCAGGCATAACCGACCG-----

***hgfb-T2***

GG-----CAGAGGATGTGCCAGGCATAACCGACCAGCCATT----------------------------------------------------------------------TTTGTGAACGTGGCCTTCTACGCT

GGGGCCCTCTAGTATGTCAAGAGAGTAACAGTAAAGTCATTGTTGATGTGCCAGGCATAACCGA-------------------------------------------------TGTGAACGTGGCCTTCTACGCT

GGGGCCCTCTAGTATGTCAAGAGAGTAACAGTAAAGTCATTGTTGGTGTG---AGCATAAATAA-----------------GGATGTGCCAGGCATAACCGACCAGCCATTTTTGTGAACGTGGCCTTCTACGCT

GGGGCCCTCTAGTATGTCAAGAGAGTAACAGTAAAGTCATTGTTGGTGTG---AGCATAAATGG--------------------------------------------ATTTTTGTGAACGTGGCCTTCTACGCT

GGGGCCCTCTAGTATGTCAAGAGAGTAACAGTAAAGTCATTGTTGGTGTG---AGCATAAATGG-------------------ATGTGCCAGGCATAACCGACCAGCCATTTTTGTGAACGTGGCCTTCTACGCT

GGGGCCCTCTAGTATGTCAAGAGAGTAACAGTAAAGTCATTGTTGGTGTG---AGCATAAATGG--------------GGAGGATGTGCCAGGCATAACCGACCAGCCATTTTTGTGAACGTGGCCTTCTACGCT

GGGGCCCTCTAGTATGTCAAGAGAGTAACAGTAAAGTCATTGTTGGTGTG---AGCATAAATGG-------------CAGAGGATGTGCCAGGCATAACCGA------CCGTTTGTGAACGTGGCCTTCTACGCT

GGGGCCCTCTAGTATGTCAAGAGAGTAACAGTAAAGTCATTGTTGGTGTG---AGCATAAATGGA-----------------------------ATAAA--------------TGTGAACGTGGCCTTCTAAGCT

GGGGCCCTCTAGTATGTCAAGAGAGTAACAGTAAAGTCATTGTTGGTGTG---AGCATAAATGGA-----------------------------ATAAA--------------TGTGAACGTGGCCTTCTACGCT

GGGGCCCTCTAGTATGTCAAGAGAGTAACAGTAAAGTCATTGTTGGTGTG---AGCATAAATGGA----------ATA---------------------------------AATGTGAACGTGGCCTTCTACGCT

GGGGCCCTCTAGTATGTCAAGAGAGTAACAGTAAAGTCATTGTTGGTGTG---AGCATAAATGGGGATTTATGTGCCAGGAGGATGTGCCAGGCATAACCGA------CCGTTTGTGAACGTGGCCTTCTACGCT

TTGGCCCTCTAGTATGTCAAGAGAGTAACAGTAAAGTCATTGTTGGTGTG---AGCATAAATGGGGATTTATGTGCCAGGAGGATGTGCCAGGCATAACCGA------CCGTTTGTGAACGTGGCCTTCTACGCT

***loxhd1b*-T1**

CGATCAGACACAGAAACACATGCGCATCCGTCC-CGCTGCCGCTCACATCCCCTGTGTAGA

------------AAAACAC------------------------------------------

CGATCAGACACAGAAACACA----------------------------TCCCCTGTGTAGA

CGATCAGACACAGAAACACATGCGCATCCG------------------TCCCCTGTGTAGA

CGATCAGACACAGAAACACATGCGCATCCG-------------TCACATCCCCTGTGTAGA

CGATCAGACACAGAAACACATGCGCATCCGTC--CGCTGCCGCTCACATCCCCTGTGTAGA

CGATCAGACACAGAAACACATGCGCATCCGTCC-CGCTGCC-CTCACATCCCCTGTGTAGA

CGATCAGACACAGAAACACATGCGCATCCGTCC-CGCTGCCGCTCACATCC-CTGTGTAGA

CGATCAGACACAGAAACACATGCGCATCCGTCC-CGCTGCCTCTCACATCCCCTGTGTAGA

CGATCAGACACAGAAACACATGCGCATCCGTCCGCTCTGCCGCTCACATCCCCTGTGTAGA

CGATCAGACACAGAGACACATGCGCATCCGTCC-CGCTGCCGCCCACATCCCCTGTGTAGA

CGATCAGACACGGAAACACATGCGCATCCGTCC-CGCTGCCGCTCACATCCCCTGTGTAGA

CGATCGGACACAGAAACACATGCGCATCCGTCC-CGCTGCCGCTCACATCCCCTGTGTAGA

***loxhd1b*-T2**

AGTCCAGTGTTTCGCTGGGGTAAATCTCCACCT--CCGTCTTCCCATCAGCCTCATCCTCAC

AGTCCAGTGTTTCGCTGGGGTAAA--------------TCTTCCCATCAGCCTCATCCTCAC

AGTCCAGTGTTTCGCTGGGGTAAATC------------TCTTCCCATCAGCCTCATCCTCAC

AGTCCAGTGTTTCGCTGGGGTAAATCT--------CCACCTTCCCATCAGCCTCATCCTCAC

AGTCCAGTGTTTCGCTGGGGTAAATCT--------CCATCTTCCCATCAGCCTCATCCTCAC

AGTCCAGTGTTTCGCTGGGGTAAATCT--------CCGTCTTCCCATCAGCCTCATCCTCAC

AGTCCAGTGTTTCGCTGGGGTAAATCTCCACCTCACCGTCTTCCCATCAGCCTCATCCTCAC

***msrb3*-T1**

TAGCGCAGCGGGTGTAGTCAGTATTAGGAGTGGTCGTGTGGTCTTATGGGAGCGCATGCA

TAGCACAGCGGGTGTAGTCAGTATT-------------------TATCACTGCGCATGCA

TAGCGCAGCGGGTGTAGTCAGTATT-------------------TATCACTGCGCATGCA

TAGCGCAGCGGGTGTAGTCAGTATT------GGTCGTGTGGTCTTATGGGAGCGCATGCA

TAGCGCAGCGGGTGTAGTCAGTATTAG-AGTGGTCGTGTGGTCTTATGGGAGCGCATGCA

TAGCGCAGCGGGTGTAGTCAGTGGT---------CGTGTGGTCTTATGGGAGCGCATGCA

TAGCGTAGCGGGTGTAGTCAGTATTAGGAGTGGTCGTGTGGTCTTATGGGAGCGCATACA

***marveld2a*-T2**

CATGATCACAGGTTTAGGAGTGTGTCCCGCTGGAATGTGTCCTTTCACAACTTTAGGATT

CATGATCACAGGTTTAGGAGTGTGTCC---------------TTTCACAACTTTAGGATT

***marveld2b*-T1**

TTCACTGTTGGGCCCAATGCAGGATTTTG--TCGGACTGAAGCTGGACAGAACGCTGCCATC

TTCACTGTTGGGCCCAATGCAGGATTTG---TCGGACTGAAGCTGGACAGAACGCTGCCATC

TTCACTGTTGGGCCCAATGCAGGATTTGATTTCGGACTGAAGCTGGACAGAACGCTGCCATC

***myo7aa*-T1**

TTCGGAGGATTCCCGCCTCGTTCAGATCCCCCAGCCGGATCATGTCTTCCACACCGTGAA

TTCGGAGGATTCCCGCCTCGTTCAGATCC-------GGATGATGTCTTCCACACCGTGAA

TTCGGAGGATTCCCGCCTCGTTCAGATCCCCC----GGATCATGTCTTCCACACCGTGAA

TTCGGAGGATTCCCGCCTCGTTCAGATCCCCCAGG-GGATCATGTCTTCCACACCGTGAA

TTCGGAGGATTCCCGCCTCGTTCAGATCCCCCC---GGATCATGTCTTCCACACCGTGAA

***pcdh15b*-T2**

ATAGTGTATTCAATCTGTCCATTAGGACCATCATCGA---------TGTCAACAGCCCCGTTGTTCCCT

ATAG------------------------------------------TGTCAACAGCCCCGCTGTTCCCT

ATAGTG------------------------------------------TCAACAGCCCCGTTGTTCCCT

ATAGTGTATTCAATCTGTCCATTAGGA-------------------TGTCAACAGCCCCGTTGTTCCCT

ATAGTGTATTCAATCTGTCCATTAGGACCA------------------TCAACAGCCCCGTTGTTCCCT

ATAGTGTATTCAATCTGTCCATTAGGACCATCA-------------TGTCAACAGCCCCGTTGTTCCCT

ATAGTGTATTCAATCTGTCCATTAGGACCATCAA------------TGTCAACAGCCCCGTTGTTCCCT

ATAGTGTATTCAATCTGTCCATTAGGACCATCAAAATTGTGGTCCATGTCAACAGCCCCGTTGTTCCCT

ATAGTGTATTCAATCTGTCCATTAGGACCATCACGA----------TGTCAACAGCCCCGTTGTTCCCT

ATAGTGTATTCAATCTGTCCATTAGGACCATCATGA----------TGTCAACAGCCCCGTTGTTCCCT

ATAGTGTATTCAATCTGTCCATTAGGACCATCGA------------TGTCAACAGCCCCGTTGTTCCCT

ATAGTGTATTCAATCTGTCCATTAGGACCATTTTTTTTTCG----ATGTCAACAGCCCCGTTGTTCCCT

ATAGTGTATTCAATCTGTCCATTAGTTTTAACAGCATCGA------TGTCAACAGCCCCGTTGTTCCCT

***pou4f3*-T1**

AGAGTCTGCTGGCCCGCGCT--------GAAGCT-----------------------CTGGCGGCGGCTGACATCGTGTCTCACGGCAAGA

AGAGTCTGCTGGCCAGCGGCTTTGATGAGAGTCT----------------------GCTGGCGGCGGCTGACATCGTGTCTCACGGCAAGA

AGAGTCTGCTGGCCCGCG-------------------------------------------------CTGACATCGCGTCTCACGGCAAGA

AGAGTCTGCTGGCCCGCG-------------------------------------------------CTGACATCGTGTCTCACGGCAAGA

AGAGTCTGCTGGCCCGCGCT---------------------------------------GGCGGCGGCTGACATCGTGTCTCACGGCAAGA

AGAGTCTGCTGGCCCGCGCT----------GTCT----------------------GCTGGCGGCGGCTGACATCGTGTCTCACGGCAAGA

AGAGTCTGCTGGCCCGCGCT--------GAA-----------------------------GCGGCGGCTGACATCGTGTCTCACGGCAAGA

AGAGTCTGCTGGCCCGCGCT--------GAACCG-------------------------CGCTGAAGCTCA---CGTGTCTCACGGCAAGA

AGAGTCTGCTGGCCCGCGCT--------GAAG-----------------------------------CTGACATCGTGTCTCACGGCAAGA

AGAGTCTGCTGGCCCGCGCT--------GAAGCT----------------------------GGCGGCTGACATCGTGTCTCACGGCAAGA

AGAGTCTGCTGGCCCGCGCT--------GAAGCTAGCAGCAGACTCTCATCAAGGCGGCGGCGGCGGCTGACATCGTGTCTCACGGCAAGA

AGAGTCTGCTGGCCCGCGCT--------GAAGCTCG---------------GCGGCGATGGCGGCGGCTGACATCGTGTCTCACGGCAAGA

***pou4f3*-T2**

AACGTGGTTCGGGTTTGGTTCTGTAATCAAC--------------------------------------------------GGCAAAAACAGAAAAGGATGAAGTATTCA

AACGTGGTTCGGGTTTGGTTC-------AAC--------------------------------------------------GGCAAAAACAGAAAAGGATGAAGTATTCA

AACGTGGTTCGGGTTTGGTTCTGT----AAC--------------------------------------------------GGCAAAAACAGAAAAGGATGAAGTATTCA

AACGTGGTTCGGGTTTGGTTCTGTAA--AACCAC-----------------------------------------------GGCAAAAACAGAAAAGGATGAAGTATTCA

AACGTGGTTCGGGTTTGGTTCTGTAATCAACGGCAAAAACAGAAAAGGATGAAGTATTCAGCAGTGCACTAATACTGTTAGAGCAAAAACAGAAAAGGATGAAGTATTCA

***prdx2*-T1**

CCGTGATTACGGAGTCCTGAAG----------------GAGGACGAGGGCATC----GCCTACAGGTTTGTGATTTTATG

CCGTGATTACGGAGTCCTGAAG----------------GAGAG-------ATCGGAAGAGCACACGTCTGAACTCCAGTC

CCGTGATTACGGAGTCCTGAAG----------------GAGGAC------ATC----GCCTACAGGTTTGTGATTTTATG

CCGTGATTACGGAGTCCTGAAG----------------GAGGACGA-GGCATC----GCCTACAGGTTTGTGATTTTATG

CCGTGATTACGGAGTCCTGAAG----------------GAGGGC------ATC----GCCTACAGGTTTGTGATTTTATG

CCGTGATTACGGAGTCCTGAAGGAG-------------GAGGGC------ATC----GCCTACAGGTTTGTGATTTTATG

CCGTGATTACGGAGTTCTGAAC----------------GAGGGC------ATC----GCCTACAGGTTTGTGATTTAATG

CCGTGATTACGGAGTTCTGAAG----------------GAGGAC------ATC----GCCTACAGGTTTGTGATTTAATG

CCGTGATTACGGAGTTCTGAAG----------------GAGGAT---GGCATC----GCCTACAGGTTTGTGATTTAATG

CCGTGATTACGGAGTTCTGAAG----------------GAGGGC------ATC----GCCTACAGGTTTGTGATTTAATG

CCGTGATTACGGAGTTCTGAAGGAGGAACGAGGGCATCGAGGGC------ATC----GCCTACAGGTTTGTGATTTAATG

CCGTGATTACGGAGTTCTGAAGGCATCGCC--------GAGGGC------ATC----GCCTACAGGTTTGTGATTTAATG

***prdx3-*T1**

CTGCCAGATGGGCTCCAGCGGTCACTCAAGCGGCCCCTCACTTCAAGGGCACTGCTGTTA

CTGCCAGATGGGCTCCA-----------AGCGGCCCCTCACTTCAAGGGCACTGCTGTTA

CTGCCAGATGGGCTCCAGC----------------------TTCAAGGGCACTGCTGTTA

CTGCCAGATGGGCTCCAGC------------GGCCCCTCACTTCAAGGGCACTGCTGTTA

CTGCCAGATGGGCTCCAGC------------GGTCACTCACTTCAAGGGCACTGCTGTTA

CTGCCAGATGGGCTCCAGCG-----------GGCCCCTCACTTCAAGGGCACTGCTGATA

CTGCCAGATGTGCTCCAGCGGTCACTCAAGCGGCTCCTCACTTCAAGGGCACTGCTGTTA

***prdx3-*T2**

TGGTGTGTCTGTGGACTCTCACTTCACCCACCTGG----------CCTGGACCAACACCCCGAGAAAGGT

TGGTGTGTCTGTGGACTCTCACTTCAC------------------------CCAACACCCCGAGAAAGGT

TGGTGTGTCTGTGGACTCTCACTTCACCCA---------------CCT----------------------

TGGTGTGTCTGTGGACTCTCACTTCACCCA---------------CCTGGACCAACACCCCGAGAAAGGT

TGGTGTGTCTGTGGACTCTCACTTCACCCACCTGGACAG------CCTGGACCAACACCCCGAGAAAGGT

TGGTGTGTCTGTGGACTCTCACTTCACCCACCTGGACCAACACCCCCTGGACCAACACCCCGAGAAAGGT

TGGTGTGTCTGTGGACTCTCACTTCACCCACTTCACTTCACCACGCCTGGACCAACACCCCGAGAAAGGT

TGGTGTGTCTGTGGACTCTCACTTCACCCG---------------CCTGGACCAACACCCCGAGAAAGGT

TGGTGTGTCTGTGGACTCTCACTTCACTCCG--------------CCTGGACCAACACCCCGAGAAAGGT

***prdx4*-T1**

GAAAATACCTGGTTTTCTTCTTCTACCCTCTGGACTTGTGAGCATGCTATTATTAATTTA

GAAAATACCTGGTT-TCTTCTTCTACCCTCTGGACTTGTGAGCATGCTATTATTAATTTA

***prdx4*-T2**

AGGACACGTTTATCCCGGAGAGGCTTTCCGCGTGCCCGTATCTGATCATTCCTTACACCT

AGGACACGTTTATCCCGGAGAGGCTTTCC----GCCCGTATCTGATCATTCCTTACACCT

AGGACACGTTTATCCCGGAGAGGCTTTCCG------CGTATCTGATCATTCCTTACACCT

AGGACACGTTTATCCCGGAGAGGCTTT-------CCCGTATCTGATCATTCCTTACACCT

AGGACACGTTTATCCCGGAGAGG----------------------------CTTACACCT

***prps1b*-T2**

GAAAGCATGGGATGACTGCAGTGACTC-TAGTGGCAGATGCTATTTTGCATGCATTAATCA

GAAAGCATGGGATGACTGCAGTGA----------------CTATTTTGCATGCATTAATCA

GAAAGCATGGGATGACTGCAGTGA----------C-TATGCTATTTTGCATGCATTAATCA

GAAAGCATGGGATGACTGCAGTGA----------CAGATGCTATTTTGCATGCATTAATCA

GAAAGCATGGGATGACTGCAGTGACT------GGCAGATGCTATTTTGCATGCATTAATCA

GAAAGCATGGGATGACTGCAGTGACTCCCAGTGGCAGATGCTATTTTGCATGCATTAATCA

GAAAGCATGGGATGACTGCAGTGG----------CAGATGCTATTTTGCATGCATTAATCA

***ptprn2*-T1**

TGCGGTGTTTGGTCAGTGTCTGAGGT-ATCCAGGGTCAGATGTGAGCTCTTTCGATGTGTC

TGCGGTGTTTGGTCAGTGTCTGAGGTAATCCAGGGTCAGATGTGAGCTCTTTCGATGTGTC

***ptprn2*-T2**

ACTCCTGCTACCAAAATAGAAAAACTGCCTGGA---------GCTTCCAGACAACCTCCAAAGCCCCAA

ACTCCTGCTACCAAAATAGAAAAACTGCCTGG-----------------------------------AA

ACTCCTGCTACCAAAATAGAAAAACTGCCTGG----AAAGGAGGTTCCAGACAACCTCCAAAGCCCCAA

ACTCCTGCTACCAAAATAGAAAAACTGCCTGGATCTAATTGTTCTTCCAGACAACCTCCAAAGCCCCAA

***ptprna*-T1**

ATGGTTTTAGACCCGCACCAGTCCTCCCCGCT--------CCGGATGCAAACCGTACCGGTGGACCCT

ATGG-TTTAGACCCGCACCAGTCCTCCCCGCT--------CCGGATGCAAACCGTACCGGTGGACCCT

ATGGTTTTAGACCCGCACCAGTCCTACCCGCT--CCTCCTACGGATGCAAACCGTACCGGTGGACCCT

ATGGTTTTAGACCCGCACCAGTCCTCACCGCT---------CGGATGCAAACCGTACCGGTGGACCCT

ATGGTTTTAGACCCGCACCAGTCCTCCCC------------CCGATGCAAACCGTACCGGTGGACCCT

ATGGTTTTAGACCCGCACCAGTCCTCCCCGCT-------------CAAAAACCGTACCGGTGGACCCT

ATGGTTTTAGACCCGCACCAGTCCTCCCCGCT--CCTCCTACGGATGCAAACCGTACCGGTGGACCCT

ATGGTTTTAGACCCGCACCAGTCCTCCCCGCT----------CGATGCAAACCGTACCGGTGGACCCT

ATGGTTTTAGACCCGCACCAGTCCTCCCCGCT---------CGGATGCAAACCGTACCGGTGGACCCT

ATGGTTTTAGACCCGCACCAGTCCTCCCCGCTGGGATGCCCCGGATGCAAACCGTACCGGTGGACCCT

ATGGTTTTAGACCCGCACCAGTCCTCCCCTCT--------CCGGATGCAAACCGTACCAGTGGACCCT

***ptprna*-T2**

TACACAGCTGGGCAGTCTTTTGAAG---------------GGTTTCGGTGTGGATCCACGAGACCTGAGTCCTCA

TACACAGCTGGGCAGTCTT-----------------------TTTCGGTGTGGATCCACGAGACCTGAGTCCTCA

TACACAGCTGGGCAGTCTT-----------------------TTTCGGTGTGGATCCACGAGGCCTGAGTCCTCA

TACACAGCTGGGCAGTCTTTTGAA----------------------GGTGTGGATCCACGAGACCTGAGTCCTCA

TACACAGCTGGGCAGTCTTTTGAAG---------------------GGTGTGGATCCACGAGACCTGAGTCCTCA

TACACAGCTGGGCAGTCTTTTGAAG--------------GTGTTTCGGTGTGGATCCACGAGACCTGAGTCCTCA

TACACAGCTGGGCAGTCTTTTGAAGGGTGTGGATCGGTGTGGATCCGGTGTGGATCCACGAGACCTGAGTCCTCA

TACACAGCTGGGCAGTCTTTTGACT-------------TTTTTTTCGGTGTGGATCCACGAGACCTGAGTCCTCA

***ptprnb*-T1**

TTAAAGAGTGGGAGGCTCTGTGCTCC------------TACCAGGCAGAACCCAGCACCATCTCAGCAGCTC

--------------------------------------CACCAGGCAGAACCCAGCACCATCTCAGCAGCTC

TTAAAGAGTGGGAG------------------------------GCAGAACCCAGCACCATCTCAGCAGCTC

TTAAAGAGTGGGAGGCTCT-----------------------------------------------------

TTAAAGAGTGGGAGGCTCT-------------------CTCCAGGCAGAACCCAGCACCATCTCAGCAGCTC

TTAAAGAGTGGGAGGCTCTGTG----------------CACCAGGCAGAACCCAGCACCATCTCAGCAGCTC

TTAAAGAGTGGGAGGCTCTGTGCTC-------------CACCAGGCAGAACCCAGCACCATCTCAGCAGCTC

TTAAAGAGTGGGAGGCTCTGTGCTCAGGCAGAACCCAGCACCAGGCAGAACCCAGCACCATCTCAGCAGCTC

TTAAAGAGTGGGAGGCTCTGTGCTCCTG------GCGGAACCAGGCAGAACCCAGCACCATCTCAGCAGCTC

***prps1a*-T1**

TTATGGAGCTGCTGATCATGATCAATGCCTGT------------AAGATTGCATCGGCATCCAGAGTCACCG

TTATGGAGCTGCTGATCATGATCA-----------------------ATTGCATCGGCATCCAGAGTCACCG

TTATGGAGCTGCTGATCATGATCAATGCC--------------------TGCATCGGCATCCAGAGTCACCG

TTATGGAGCTGCTGATCATGATCAATGCCTG----------------ATTGCATCGGCATCCAGAGTCACCG

TTATGGAGCTGCTGATCATGATCAATGCCTGCTGATCATGATCAATGCCTGCATCGGCATCCAGAGTCACCG

TTATGGAGCTGCTGATCATGATCAATGCCTGT---------------ATTGCATCGGCATCCAGAGTCACCG

TTATGGAGCTGCTGATCATGATCAATGCCTGT-------------AGATTGCATCGGCATCCAGAGTCACCG

***prps1a*-T2**

TTTAGAGCCGGGCTCCAATCTCAGCC-AAGCTGGTGGCCAACATGCTGTCTGTAGCCGGAG

TTTAGAGCCGGGCTCCAATCTCAGCC-------------AACATGCTGTCTGTAGCCGGAG

TTTAGAGCCGGGCTCCAATCTCAGCC------AGTGGCCAACATGCTGTCTGTAGCCGGAG

TTTAGAGCCGGGCTCCAATCTCAGCC------GGTGGCCAACATGCTGTCTGTAGCCGGAG

TTTAGAGCCGGGCTCCAATCTCAGCCTCAGCTGGTGGCCAACATGCTGTCTGTAGCCGGAG

TTTAGAGCCGGGCTCCAATCTCAGCT------GGTGGCCAACATGCTGTCTGTAGCCGGAG

***slc26a4*-T1**

AGACGATGGTGGAGGACACATTGATGG---------------------------------------------------A------------GGTGGATGTAGAGGCCAGAGAAGCTCAGAGAG

AGACGATGGTGGAGGACACATTA--------------------------------------------------------------------GGTGGATGTAGAGGCCAGAGAAGCTCAGAGAG

AGACGATGGTGGAGGACACATTGA------------------------------------------------------A------------GGTGGATGTAGAGGCCAGAGAAGCTCAGAGAG

AGACGATGGTGGAGGACACATTGATGCCTT-------------------------------------------------------------GGTGGATGTAGAGGCCAGAGAAGCTCAGAGAG

AGACGATGGTGGAGGACACATTGATGG---------------------------------------------------A------------GGT-GATGTAGAGGCCAGAGAAGCTCAGAGAG

AGACGATGGTGGAGGACACATTGATG---------------------------------------------------------------------GATGTAGAGGCCAGAGAAGCTCAGAGAG

AGACGATGGTGGAGGACACATTGATGG---------------------------------------------------ATGTAGTGGATGTAGTGGATGTAGAGGCCAGAGAAGCTCAGAGAG

AGACGATGGTGGAGGACACATTGATGG---------------------------------------------------TCCTTGATG----GGTGGATGTAGAGGCCAGAGAAGCTCAGAGAG

AGACGATGGTGGAGGACACATTGATG------------------------------------------------------------------GTGGATGTAGAGGCCAGAGAAGCTCAGAGAG

AGACGATGGTGGAGGACACATTGATGGTGGATGTAGAGGCCATTGATGGTGGATGTCTGGCCTCTACATCCACTCTACA------------GGTGGATGTAGAGGCCAGAGAAGCTCAGAGAG

AGACGATGGTGGAGGACACATTG------------------------------------------------------------------------GATGTAGAGGCCAGAGAAGCTCAGAGAG

AGACGATGGTGGAGGACACATT---------------------------------------------------------------------GGTGGATGTAGAGGCCAGAGAAGCTCAGAGAG

AGACGATGGTGGAGGACA-------------------------------------------------------------------------GGTGGATGTAGAGGCCAGAGAAGCTCAGAGAG

***slc26a4*-T2**

TATAGCTTTTGGCGTCAGCAACATTTTCGGAGGATGTTTCTCAAGCTTTGTGGCCAGCAC

TATAGC-TTTGGCGTCAGCAACATTTTCGGAGGATGTTTCTCAAGCTTTGTGGCCAGCAC

TATAGCTTTT-GCGTCAGCAACATTTTCGGAGGATGTTTCTCAAGCTTTGTGGCCAGCAC

TATAGCTTTTGGCGTCAGCAAC-----------ATGTTTCTCAAGCTTTGTGGCCAGCAC

TATAGCTTTTGGCGTCAGCAACATTCTCGGAGGATGTTTCTCAAGCTTTGTGG-CAGCAC

TATAGCTTTTGGCGTCAGCAACATTTTCGGAGGATGTTTCTCAAGCTTTGT-GCCAGCAC

TATAGCTTTTGGCGTCAGCAACATTTTCGGAGGATGTTTCTCAAGCTTTGTGG-CAGCAC

TATAGCTTTTGGCGTCAGCAAC------GGAGGATGTTTCTCAAGCTTTGTGGCCAGCAC

TATAGCTTTTGGTGTCAGCAACATTTTCGGAG-ATGTTTCTCAAGCTTTGTGGCCAGCAC

***slc26a5*-T1**

CTAGAGTTGTCAGAGCTACAACCACCTCCACTCTTCTGGAATCACGGGCCTCAATATTCA

CTAGAGTTGTCAGAGCTACAACCACCTCCA-----CTGGAATCACGGGCCTCAATATTCA

CTAGAGTTGTCAGAGCTACAACCACCTCCA---CTCTGGAATCACGGGCCTCAATATTCA

CTAGAGTTGTCAGAGCTACAACCACCTCCA--CTTCTGGAATCACGGGCCTCAATATTCA

***smpx*-T1**

GTATCTTCTCTCCTCTTCACAGGATGTCCCGCTC------------CAGGACGCAGAG-CCCCCATCGGGATA

GTATCTCCTCTCCTCTTCACAGGATGTCC----------------------CGCAGAGCCCCCCATCGGGATA

GTATCTTC--------------------------------------CAGGACGCAGAG-CCCCCATCGGGATA

GTATCTTCTCTCCTCTTCACAGGATGTCC----------------------CGCAGAGCCCCCCATCGGGATA

GTATCTTCTCTCCTCTTCACAGGATGTCCC-------------------GACGCAGAG-CCCCCATCGGGATA

GTATCTTCTCTCCTCTTCACAGGATGTCCCC---------------CAGGACGCAGAG-CCCCCATCGGGATA

GTATCTTCTCTCCTCTTCACAGGATGTCCCGCTAT-----------AAGGACGCAGAG-CCCCCATCGGGATA

GTATCTTCTCTCCTCTTCACAGGATGTCCCGCTC------------CAGGACGCAGAG--CCCCATCGGGATA

GTATCTTCTCTCCTCTTCACAGGATGTCCCGCTGT-----------AAGGACGCAGAG-CCCCCATCGGGATA

GTATCTTCTCTCCTCTTCACAGGATGTCCCGCTGTGAAGAGGGGCTCTGGACGCAGAG-CCCCCATCGGGATA

GTATCTTCTCTCCTCTTCACAGGATGTCCCGCTTCA----------CAGGACGCAGAG-CCCCCATCGGGATA

GTATCTTCTCTCCTCTTCACGGGATGTCCCGCTC------------CAGGACGCAGAG-CCCCCATCGGGATA

***smpx*-T2**

----------GGCAGAGGCTTCTTCTCTTC------------------------------

CACAGCTCCAGGCAGAGGCTTCTTCTCTTCTGGAGTGACTGGAGACACCTGTGAAACCAA

CACAGCTCCAGGCAGAGGCTTCTTCTCT---GGAGTGACTGGAGACACCTGTGAAACCAA

***tjp2a*-T1**

TCTCGGTCCAGGTTGTGTTCGCTGCGAAAGCGGCGACCTCGCTCTGGGCTGTAGTTGCGG

TCCCGGTCCAGGTTGTGTTCGCTGCGAAAGCGGCGACCTCGCTCTGGGCTGTAGTTGCGG

TCTCGGTCCAGGTTGTGTTCACTGCGAAAGCGGCGACCTCGCTCTGGGCTGTAGTTGCGG

TCTCGGTCCAGGTTGTGTTCGCTGCGAAAGAGGCGACCTCGCTCTGGGCTGTAGTTGCGG

TCTCGGTCCAGGTTGTGTTCGCTGCGAAAGCGGCGACCTCGCTCTGGGCCGTAGTTGCGG

TCTCGGTCCAGGTTGTGTTCGCTGCGAAAGCGGCGACCTCGTTCTGGGCTGTAGTTGCGG

TCTCGGTCCAGGTTGTGTTCGCTGCGAAAG-GGCGACCTCGCTCTGGGCTGTAGTTGCGG

TCTCGGTCCAGGTTGTGTTCGCTGCGAGAGCGGCGACCTCGCTCTGGGCTGTAGTTGCGG

TCT-GGTCCAGGTTGTGTTCGCTGCGAAAGCGGCGACCTCGCTCTGGGCTGTAGTTGCGG

***tjp2a*-T2**

------------------------------CCA-------------CCTCGGCAGGACTGTCC----------

TGACTATTTGGTCTCCAGTGCGCAGACCCTCCA-------------CCTCGGCAGGACTGTCCTCTTGAACGC

CGACTATTTGGTCTCCAGTGCGCAGAC-------------------CCTCGGCAGGACTGTCCTCTTGAACGC

---------GGTCTCCAGTGCGCAGAC-------------------CCTCGGCAGGACTGTCCTCTTGAACGC

TGACTAGTTGGTCTCCAGTGCGCAGAC-------------------CCTC-----------CCTCTTGAACGC

TGACTATTTGGTCTCCAGTACGCAGACCCTCCAGTGCGCAGACCCTCCTCGGCAGGACTGTCCTCTTGAACGC

TGACTATTTGGTCTCCAGTGCCCAGAC-------------------CCTC------------CTCTTGAACGC

TGACTATTTGGTCTCCAGTGCGCAGAC-----------------------------------CACTTGAACGC

TGACTATTTGGTCTCCAGTGCGCAGAC-------------------CATCGGCAGGACTGTCCTCTTGAACGC

TGACTATTTGGTCTCCAGTGCGCAGAC-------------------CCTC--CAGGACTGTCCTCTTGAACGC

TGACTATTTGGTCTCCAGTGCGCAGACCCTCCAGTGCGCAGACCCTCCTCGGCAGGACTCTCCTCTTGAACGC

TGACTATTTGGTCTCCAGTGCGCAGACCCTCCAGTGCGCAGACCCTCCTCGGCAGGACTGTCCTCTTGAACGC

TGACTATTTGGTCTCCAGTGCGCAGACCCTCCAGTGCGCAGAC---CCTCGGCAGGACTGTCCTCTTGAACGC

TGACTATTTGGTCTCCAGTGCGCAGAC-------------------CCTC-----------CCTCTTGAACGC

TGACTATTTGGTCTCCAGTGCGCAGAC-------------------CCTCGGCAGGACTCTCCTCTTGAACGC

TGACTATTTGGTCTCCAGTGCGCAGAC-------------------CCTCGGCAGGACTGTCCTCTTGAACGC

TGACTATTTGGTCTCCAGTGCGCAGAC-----------------------------------CTCTTGAACGC

TGACTATTTGGTCTCCAGTGCGCGGAC-----------------------------------CTCTTGAACGC

TGACTATTTGGTCTCCAGTGTGCAGAC-------------------CCTCGGCAGGACTGTCCTCTTGAACGC

TGACTCTTTGGTCTCCAGTGCGCAGAC-------------------CCTCGGCAGAACTGTCCTCTTGAACGC

***tmie*-T1**

TCTCTCTCTCTTATCTCATAGCTCCTGCCAACA--------------GACCCTCCGAAAAAGCCAGACCCCGTC

TCTCTCTCTCTTATCTCATAGCTCCTGCCAAC-----------------------AAAAAAGCCAGACCCTGTC

TCTCTCTCTCTTATCTCATAGCTCCTGCCAAC----------------ACCCTCCGAAAAAGCCAGACCCTGTC

TCTCTCTCTCTTATCTCATAGCTCCTGCCAAC---------------AACCCTCCGAAAAAGCCAGACCCTGTC

TCTCTCTCTCTTATCTCATAGCTCCTGCCAACA--------------AAACCTCCGAAAAAGCCAGACCCTGTC

TCTCTCTCTCTTATCTCATAGCTCCTGCCAACA--------------GACCCTCCGAAAAAGCCAGACCCTGTC

TCTCTCTCTCTTATCTCATAGCTCCTGCCAACATA------------GACCCTCCGAAAAAGCCAGACCCTGTC

TCTCTCTCTCTTATCTCATAGCTCCTGCCAACTCGTGGAAACCTCAGCACCCTCCGAAAAAGCCAGACCCTGTC

TCTCTCTCTCTTATCTCATAGCTCCTGCCCAC------------------CCTCCGAAAAAGCCAGACCCTGTC

***tmie*-T2**

CAGCTCTCGTGGAAACCTCAGCACT----------CCTGACGGTCTCAGAGCAGGTACAGGCTCACGCTA

CAGCTCTCGTGGAAAC-------------------------GGTCTCAGAGCAGGTACAGGCTCATGCTA

CAGCTCTCGTGGAAACCTCAGCACA-----------CTGACGGTCTCAGAGCAGGTACAGGCTCATGCTA

CAGCTCTCGTGGAAACCTCAGCACT---------------------CAGAGCAGGTACAGGCTCATGCTA

CAGCTCTCGTGGAAACCTCAGCACT-------------------CTCAGAGCAGGTACAGGCTCATGCTA

CAGCTCTCGTGGAAACCTCAGCACT--------------CCGGTCTCAGAGCAGGTACAGGCTCATGCTA

CAGCTCTCGTGGAAACCTCAGCACT-------------GACGGTCTCAGAGCAGGTACAGGCTCATGCTA

CAGCTCTCGTGGAAACCTCAGCACT-----------CAGACGGTCTCAGAGCAGGTACAGGCTCATGCTA

CAGCTCTCGTGGAAACCTCAGCACT-----------CTGACGGTCTCAGAGCAGGTACAGGCTCATGCTA

CAGCTCTCGTGGAAACCTCAGCACT----------CCTGACGGTCTCAGAGCAGGTACAGGCTCATGCTA

CAGCTCTCGTGGAAACCTCAGCACT--GCTCTGAGACTGACGGTCTCAGAGCAGGTACAGGCTCATGCTA

CAGCTCTCGTGGAAACCTCAGCACTCGGTCTCAGAGCA---GGTCTCAGAGCAGGTACAGGCTCATGCTA

CAGCTCTCGTGGAAACCTCAGCACTCTCGTGGAAACCTGACGGTCTCAGAGCAGGTACAGGCTCATGCTA

***tmprss3a*-T1**

GTGTTGAGTGGGTTTCTGTTAGAGGCTCTTTGGAAGGTACTTCAGATGTGGGTTGGACTT

GTGTTGAGTGGGTTTCTGTTAGAGG--------AAGGTACTTCAGATGTGGGTTGGACTT

GTGTTGAGTGGGTTTCTGTTAGAGG--CTTTGGAAGGTACTTCAGATGTGGGTTGGACTT

***tmprss3a*-T2**

TGCTT-ACCACAACTGAGCTCATCT------TCTCCATGTT---------------------------CACAGTCAAAATGCCCATCGCACTGT

TATTTTAGTTGGACTGAGCTGTGCTGGGAAGTTTCGATGTTTCTCCTCCAGGTGTATTAGCATCTTAGCACAGTGCGATGGGCATTTTGACTGT

GGTCTGATGGCATCAAACAA

***Ushc1*-T1**

CTGGTAATAAATGAGCCCAAACGCCTTCCTTTGTTTGA----------------TGCCATCAGACCCTTGATTCCT

------------------------------------------------------TGCCATCAGACC----------

CTGGTAATAAATGAGCCCAAA---------------------------------TGCCATCAGACCCTTGATTCCT

CTGGTAATAAATGAGCCCAAACG------------------------------------TCAGACCCTTGATTCCT

CTGGTAATAAATGAGCCCAAACGCCTT-------------------------------------CCCTTGATTCCT

CTGGTAATAAATGAGCCCAAACGCCTT-----------------------------CCATCAGACCCTTGATTCCT

CTGGTAATAAATGAGCCCAAACGCCTTCCTT-----------------------TGCCATCAGACCCTTGATTCCT

CTGGTAATAAATGAGCCCAAACGCCTTCCTTCCTTTTTGA--------------TGCCATCAGACCCTTGATTCCT

CTGGTAATAAATGAGCCCAAACGCCTTCCTTGA---------------------TGCCATCAGACCCTTGATTCCT

CTGGTAATAAATGAGCCCAAACGCCTTCCTTTGA--------------------TGCCATCAGACCCTTGATTCCT

CTGGTAATAAATGAGCCCAAACGCCTTCCTTTGCCATCAGA-------------TGCCATCAGACCCTTGATTCCT

CTGGTAATAAATGAGCCCAAACGCCTTCCTTTGCCATCAGACCCTTGATTCCTTTGCCATCAGACCCTTGATTCCT

CTGGTAATAAATGAGCCCAAACGCCTTCCTTTGTTTGA----------------TGCCATCAGACCCTTGATTCCT

CTGGTAATAAATGAGCCCAAACGCCTTCCTTTTTTGA-----------------TGCCATCAGACCCTTGATTCCT

CTGGTAATAAATGAGCCCAAACGCCTTGA-------------------------TGCCATCAGACCCTTGATTCCT

CTGGTAATAAATGAGCCCAAACGCCTTTGA------------------------TGCCATCAGACCCTTGATTCCT

***cx35.4*-T1**

TTGTGTTCAGGGTCATGGTTTAT-GT--------CGTAGCGGCAGAAAGAGTTTGGGGTGATGAGCAGA

TTGTGTTCAGGGTCATGGTTTAT------------------GCAGAAAGAGTTTGGGGTGATGAGCAGA

TTGTGTTCAGGGTCATGGTTTAT-----------------GTCAGAAAGAGTTTGGGGTGATGAGCAGA

TTGTGTTCAGGGTCATGGTTTAT--------------GGCGGCAGAAAGAGTTTGGGGTGATGAGCAGA

TTGTGTTCAGGGTCATGGTTTAT--------------GTCGGCAGAAAGAGTTTGGGGTGATGAGCAGA

TTGTGTTCAGGGTCATGGTTTAT-------------GACCGGCAGAAAGAGTTTGGGGTGATGAGCAGA

TTGTGTTCAGGGTCATGGTTTAT-GTCAGAAAG-TTTAGCGGCAGAAAGAGTTTGGGGTGATGAGCAGA

TTGTGTTCAGGGTCATGGTTTAT-GTCAGCGTGACGAAGCGGCAGAAAGAGTTTGGGGTGATGAGCAGA

TTGTGTTCAGGGTCATGGTTTATGGT--------TTTTTATGCAGAAAGAGTTTGGGGTGATGAGCAGA

***myh9b-*T1**

TGACGGTCTTGGCGTTTCCGAAGGCTTCCAGGA---------------------------TCGGGTTTGCCTGCAGCAGCTGCTTCT

TGACCGTCTTGGCGTTTCCGAAGGCTT------------------------------------------CCTGCAGCAGCTGCTTCT

TGACCGTCTTGGCGTTTCCGAAGGCTTCCAGGA--------------------------------TTTGCCTGCAGCAGCTGCTTCT

TGACCGTCTTGGCGTTTCCGAAGGCTTCCAGGA---------------------------TCGGGTTTGCCTGCAGCAGCTGCTTCT

TGACGGTCTTGGCGTTTCCGAAGGCTTCCAGGATTTTCCAGGATTTTTCTGCAGATTTTTTCGGGTTTGCCTGCAGCAGCTGCTTCT

TGACGGTCTTGGCGTTTCCGAAGGCTTCCAGGATTTTCGGG-----------------TTTCGGGTTTGCCTGCAGCAGCTGCTTCT

TGACGGTCTTGGCGTTTCCGAAGGCTTCCATGATTTTCGGG-----------------TTTCGGGTTTGCCTGCAGCAGCTGCTTCT

**myh9b-T2**

TCTCGTATGTGGCTTTGGCCAGA-------------------GCCTCCACTGCAAACTCGGCCTGCTCCTGTGTCTGCG

TCTCGTATGTGGCTTTGGCCA---------------------------------AACTCGGCCTGCTCCTGTGTCTGTG

TCTCGTATGTGGCTTTGGCCAGA-------------------GCCTCCAC---AAACTCGGCCTGCTCCTGTGTCTGTG

TCTCGTATGTGGCTTTGGCCAGA-------------------GCCTCCACT--------GGCCTGCTCCTGTGTCTGTG

TCTCGTATGTGGCTTTGGCCAGA-------------------GCCTCCACT-------CGGCCTGCTCCTGTGTCTGTG

TCTCGTATGTGGCTTTGGCCAGAGCCTCCACTGCTGCTCAGAGCCTCCACTGCAAACTCTGCCTGCTCCTGTGTCTGTG

***myo15AA*-T1**

GCATTGTAGGAGAACTCTGACCCATTGCCTGAA---------TCTCTTGAGGTGCCACCATAGACTGAG

GCATTGTAGGAGAACTCTGACCCATTGCCTGAATGGGTCACCTCTCTTGAGGTGCCACCATAGACTGAG

***myo15AA*-T2**

ATGGAAGACAGGACCCTGAAGATACCGCTCTGGTCTTCGGCACTGAAGTGAAGTATTTCC

ATGGAAGACAGGACCCTGAAGATA----TCTGGTCTTCGGCACTGAAGTGAAGTATTTCC

ATGGAAGACAGGACCCTGAAGATA---CTCTGGTCTTCGGCACTGAAGTGAAGTATTTCC

ATGGAAGACAGGACCCTGG----ACCCCAGTGGTCTTCGGCACTGAAGTGAAGTATTTCC

***myo15AB*-T1**

GCATCAATGGTCGG----GTCTACCCCAGAA---ATGAGGCGCTGTCCATATCTTTAT----------TGGATATAT

GCATCAATGGTCGG----GTCT--------------GAGGCGCTGTCCATATCTTTAT----------TGGATATAT

GCATCAATGGTCGG----GTCTACC---------------CGCTGTCCATATCTTTAT----------TGGATATAT

GCATCAATGGTCGG----GTCTACCCCA----------GGCGCTGTCCATATCTTTAT----------TGGATATAT

GCATCAATGGTCGG----GTCTACCCCA--------GAGGCGCTGTCCATATCTTTAT----------TGGATATAT

GCATCAATGGTCGG----GTCTACCCCA-------TGAGGCGCTGTCCATATCTTTATTGGATATATATGGATATAT

GCATCAATGGTCGG----GTCTACCCCAGAAGGCGGTAGGCGCTGTCCATATCTTTAT----------TGGATATAT

GCATCAATGGTCGGCGCTGTCCATGTCA------ATGAGGCGCTGTCCATATCTTTAT----------TGGATATAT

***myo6A*-T2**

AAGCTCCCGTGGATCAAGTCTTCCCTGCTGAGGATGATGTCAACAAACATGTCGAGGACA

AAGCTCCCGTGGATCAAGTCTTCCCTGCCGAGGATGATGT-AACGAACATGTCGAGGACA

AAGCTCCCGTGGATCAAGTCTTCCCTGCCGAGGATGATGTCAACAAACATGTCGAGGACA

***ildr1b*-T1**

------------------------------GCTTCATGTTCAGAGCTGCC----------

TGCTGTCTGGACAGTCATTGGCTGGATCCTGCTTCATGTTCAGAGCTGCCTGATAAGCTA

TGCTCTCTGGACAGTCATTGGCTGGATCCTG---CATGTTCAGAGCGGCCTGATAAGCTA

TGCTCTCTGGACAGTCATTGGCTGGATCCTG---CATGTTCAGAGCTGCCTGATAAGCTA

TGCTGTCTGGACAGT------------------------TCAGAGCTGCCTGATAAGCTA

TGCTGTCTGGACAGTCATTGGCTGGATC------CATGTTCAGAGCTGCCTGATAAGCTA

TGCTGTCTGGACAGTCATTGGCTGGATCCT--------------GCTGCCTGATAAGCTA

TGCTGTCTGGACAGTCATTGGCTGGATCCTG---CATGTTCAGAGCTGCCTGATAAGCTA

TGCTGTCTGGACAGTCATTGGCTGGATCCTG---CTTATTCAGAGCTGCCTGATAAGCTA

TGCTGTCTGGACAGTCATTGGCTGGATCCTGCTTCATGTT-AGAGCTGCCTGATAAGCTA

***ildr1b*-T2**

GGACAGCACTGACAGCAGCAGACCCCG------------AACAGGATGATCAACAGTAGAGCCCCGAGGATG

GGACAGCACTGACAGCAGCAAACCCCG------------AACAGGATGATCAACAGTAGAGCCCCGAGGATG

GGACAGCACTGACAGCAGCAGACCCCG-----------------GATGATCAACAGTAGAGCCCCGAGGATG

GGACAGCACTGACAGCAGCAGACCCCGGGTCTGCTGCTCAACAGGATGATCAACAGTAGAGCCCCGAGGATG

GGACAGCACTGACAGCAGCAGACCCCGGGTCTGCTGCTCAAGAGGATGATCAACAGTAGAGCCCCGAGGATG

GGACAGCACTGACAGCAGCAGACGATC------------AACAGGATGATCAACAGTAGAGCCCCGAGGATG

GGACAGCACTGACAGCAGCAGACGATC------------AACAGGTTGATCAACAGTAGAGCCCCGAGGATG

GGACAGCACTGACAGCAGCAGACGCCGGGTCTGCTGCTCAACAGGATGATCAACAGTAGAGCCCCGAGGATG

***ptprna*-T2**

TACACAGCTGGGCAGTCTTTTGAAGG-GTTT---------------CGGTGTGGATCCACGAGACCTGAGTCCTCA

TACACAGCTGGGCAGTCTTTTGAAG--GTGT---------------------GGATCCACGAGACCTGAGTCCTCA

TACACAGCTGGGCAGTCTTTTGAAGG-GTGT---------------------GGATCCACGAGACCTGAGTCCTCA

TACACAGCTGGGCAGTCTTTTGAAGG-GTGTGGATCGGTGTGGATCCGGTGTGGATCCACGAGACCTGAGTCCTCA

TACACAGCTGGGCAGTCTTTTGAAGGTGTTT---------------CGGTGTGGATCCACGAGACCTGAGTCCTCA

TACACAGCTGGGCAGTCTTTTGACTTTTTTT--------------TCGGTGTGGATCCACGAGACCTGAGTCCTCA

TACACAGCTGGGCAGTCTTTTTCG---GTGT---------------------GGATCCACGAGACCTGAGTCCTCA

***cx30.3*-T1**

GGATGAGTTGGGGAGCACTTTATGCTCAGCTGGGAGGAGTGAATAAACACTCCACCAGCT

GGATGAGTTGGGGAGCACTTTATGCT-----GGGAGGAGTGAATAAACACTCCACCAGCT

***cx30.3*-T2**

CAGAGAAGACGGTCTTCACCATCTTTA-----------------TGGTGGGATCTTCTGCTATTTGCATTGTGCTCA

CAGAGAAGACGGTCTTCACCATCTT-------------------TGGTGGGATCTTCTGCTATTTGCATTGTGCTCA

CAGAGAAGACGGTCTTCACCATCTTTATGCAGGGATAAAGATGGTGAAGGGATCTTCTGCTATTTGCATTGTGCTCA

***eya4*-T1**

GAGGCCGTAGGGTGGAGTCGTTTGCGA--------------------------------ATAGGGCGTGTAAACTGTTGACTGCTGCATGCT

GAGGCCGTAGGGTGGAGTCCTTATTTC--------------------------------ATAGGGCGTGTAAACTGTTGACTGCTGCATGCT

GAGGCCGTAGGGTGGAGTCG----------------------------------------TAGGGCGTGTAAACTGTTGACTGCTGCATGCT

GAGGCCGTAGGGTGGAGTCGTTT-----------------------------------------GCGTGTAAACTGTTGACTGCTGCATGCT

GAGGCCGTAGGGTGGAGTCGTTT---------------------------------------GGGCGTGTAAACTGTTGACTGCTGCATGCT

GAGGCCGTAGGGTGGAGTCGTTTGCGAC------------------TAAACTGACTAAAATAGGGCGTGTAAACTGTTGACTGCTGCATGCT

GAGGCCGTAGGGTGGAGTCGTTTGCTCCACCCTACGGGTGGAGTCGTTTGCTCCACCCTATAGGGCGTGTAAACTGTTGACTGCTGCATGCT

***eya4*-T2**

AGGGGGAGTAGGCTGTCTGTCCGGGC---TGAGGGGTGGTAAATCCAGGACTGT-----------------AGCTGAGCC

AGGGG-------------------------------TGGTAAATCCAGGACTGT-----------------AGCTGAGCC

AGGGGG------------------------------TGGTAAATCCAGGACTGT-----------------AGCTGAGCC

AGGGGGAGTAGGCTGTCTGTCCGGG-----------TGGTAAATCCAGGACTGT-----------------AGCTGAGCC

AGGGGGAGTAGGCTGTCTGTCCGGGC-----------GGTAAATCCAGGACTGT-----------------AGCTGAGCC

AGGGGGAGTAGGCTGTCTGTCCGGGC----------TGGTAAATCCAGGACTGT-----------------AGCTGAGCC

AGGGGGAGTAGGCTGTCTGTCCGGGC---------GTGGTAAATCCAGGACTGT-----------------AGCTGAGCC

**AGGGGGAGTAGGCTGTCTGTCCGGGC-----AGGGGTGGTAAATCCAGGACTGT-----------------AGCTGAGCC**

AGGGGGAGTAGGCTGTCTGTCCGGGC----AGGGGGTGGTAAATCCAGGACTGT-----------------AGCTGAGCC

AGGGGGAGTAGGCTGTCTGTCCGGGC----GAGGGGTGGTAAATCCAGGACTGT-----------------AGCTGAGCC

AGGGGGAGTAGGCTGTCTGTCCGGGC----GTGGGGTGGTAAATCCAGGACTGT-----------------AGCTGAGCC

AGGGGGAGTAGGCTGTCTGTCCGGGC--TTGAGGGGTGGTAAATCCAGGACTGT-----------------AGCTGAGCC

AGGGGGAGTAGGCTGTCTGTCCGGGCGGTAAAGGGGTGGTAAATCCAGGACTGT-----------------AGCTGAGCC

AGGGGGAGTAGGCTGTCTGTCCGGGG----------TGGTAAATCCAGGACTGT-----------------AGCTGAGCC

AGGGGGAGTAGGCTGTCTGTCCGGGG----------TGGTAAATCCAGGACTGTAGCTGAGCCCTGACTGCAGCTGAGCC

AGGGGGAGTAGGCTGTCTGTCCGTCT---GGAGGGGTGGTAAATCCAGGACTGT-----------------AGCTGAGCC

AGGGGGAGTAGGCTGTCTGTCTGGGG----------TGGTAAATCCAGGACTGT-----------------AGCTGAGCC

**gpsm2-T2**

TGTATGTGTTACCCAGACTGTAGCAGGCCTGAGCC---------TCCACCGCCAGATCCTTCAGCTGTC

TGTATGTGTTACCCAGACTGCACTCTCCTGCACTCACAACACAATCCACCGCCAGATCCTTCAGCTGTC

TGTATGTGTTACCCAGACTGTAGCAGG-----------------CCCACCGCCAGATCCTTCAGCTGTC

TGTATGTGTTACCCAGACTGTAGCAGGCC---------------TCCACCGCCAGATCCTTCAGCTGTC

***ildr1a*-T1**

CTCAGAAACTGGGCACTAATGAGGC-----GGTGCTGGGGGCC---------GAATACCGGGACCGCAAGATCT

CTCAGAAACTGGGCACTAAT----------------GGGGGCC---------GAATACCGGGACCGCAAGATCT

CTCAGAAACTGGGCACTAATAATGC----------TGGGGGCC---------GAATACCGGGACCGCAAGATCT

CTCAGAAACTGGGCACTAATGAGGC-----------GGGGGCC---------GAATACCGGGACCGCAAGATCT

CTCAGAAACTGGGCACTAATGAGGC----------TGGGGGCC---------GAATACCGGGACCGCAAGATCT

CTCAGAAACTGGGCACTAATGAGGC-----GGTGCTGGGGCC----------GAATACCGGGACCGCAAGATCT

CTCAGAAACTGGGCACTAATGAGGCCCACTAATGCTGGGGGCCGAATACCGGGAATACCGGGACCGCAAGATCT

***ildr1a*-T2**

ACTCATCGGTGCGCTGCTCCTCATCATCCTCTTCTGCATCTGCTGCTGCCAGTGCTGCCC

ACTCATCGGTGCGCTGCTCATCATCATCCTCTTCTGCATCTGCTGCTGCCAGTGCTGCCC

ACTCATCGGTGCGCTGCTCCTCATCATCCTCTT---------------------CTGCCC

***lhfpl5a*-T2**

TAGTTTGTGTGGTAGATCTTGGCAGCCTCTTGGGCAGATAGCATTTTCGCCATGTTTGCT

TAGTTTGTGTGGTAGATCTTGG------------CAGATAGCATTTTCGCCATGTTTGCT

TAGTTTGTGTGGTAGATCTTGG-----------GCAGATAGCATTTTCGCCATGTTTGCT

***loxhd1a*-T1**

CAAGAACAGTGGTAAGCTGTTCCTGGA-AGGCGGCACGTTTGAGCGCGCTCAGATCGACAT

CAAGAACAGTGGTAAG----------------AACAGTGGTAAGC-CGCTCAGATCGACAT

CAAGAACAGTGGTAAG--------------GCGGCACGTTTGAGCGCGCTCAGATCGACAT

CAAGAACAGTGGTAAGC----------------------------GCGCTCAGATCGACAT

CAAGAACAGTGGTAAGCTG----------------GCGTTTGAGCGCGCTCAGATCGACAT

CAAGAACAGTGGTAAGCTGT---------------ACGTTTGAGCGCGCTCAGATCGACAT

CAAGAACAGTGGTAAGCTGTTCC------------ACGTTTGAGCGCGCTCAGATCGACAT

CAAGAACAGTGGTAAGCTGTTCCT-------------GTTTGAGCGCGCTCAGATCGACAT

CAAGAACAGTGGTAAGCTGTTCCT-----GGCGGCACGTTTGAGAGCGCTCAGATCGACAT

CAAGAACAGTGGTAAGCTGTTCCT-----GGCGGCACGTTTGAGCGCGCTCAGATCGACAT

CAAGAACAGTGGTAAGCTGTTCCTGG---------ACGTTTGAGCGCGCTCAGATCGACAT

CAAGAACAGTGGTAAGCTGTTCCTGGGTAGGCGGCACGTTTGAGCGCGCTCAGATCGACAT

CAAGAACAGTGGTAAGCTGTTCTT------GCGGCACGTTTGAGCGCGCTCAGATCGACAT

CAAGAACAGTGGTAAGCTT---------GAGCGGCACGTTTGAGCGCGCTCAGATCGACAT

CAAGAGCAGTGGTAAGCTGTTCCT-----GGCGGCACGTTTGAGCGCGCTCAGATCGACAT

***loxhd1a-T2***

ATGGGCAGCTGGGCCGTGAGTTAGTGCCTGTGGACGAGGCTTTCATGAAGAGAGATGAAG

ATGGGCA--------------------CTGTGGACGAGGCTTTCATGAAGAGAGATGAAG

ATGGGCAGCTGGGCCGTGAGTTAGTG------GACGAGGCTTTCATGAAGAGAGATGAAG

ATGGGCAGCTGGGCCGTGAGTTAGTG-CTGTGGACGAGGCTTTCATGAAGAGAGATGAAG

ATGGGCAGCTGGGCCGTGAGTTAGTGAGTT--------------------AGAGATGAAG

ATGGGCAGCTGGGCCGTGAGTTAGTGC------ACGAGGCTTTCATGAAGAGAGATGAAG

ATGGGCAGCTGGGCCGTGAGTTAGTGCCTGTTGACGAGGCTTTCATGAAGAGAGATGACG

**ptprq-T1**

TAAACCTGAAGGTGAACGGGTCGGTTC----------------------------CACCGGCATCCTGCTG--TCCTGGCGGATGCCGAT

TAAACCTGAAGGTGAACGGGCCGGTTC----------------------------CACCGGCATCCTGCTG--TCCTGGCGGATGCCGAT

TAAACCTGAAGGTGAACGGGT-------------------------------------CGGCATCCTGCTG--TCCTGGCGGATGCCGAT

TAAACCTGAAGGTGAACGGGT-------------------------------------CGGCATCCTGCTG--TCCTGGCTGATGCCGAT

TAAACCTGAAGGTGAACGGGTCGGTCC----------------------------------CGTTCTGGCGGATCCTGGCGGATGCCGAT

TAAACCTGAAGGTGAACGGGTCGGTTCAAGGTGAA--------------------CACCGGCATCCTGCTG--TCCTGGCGGATGCCGAT

TAAACCTGAAGGTGAACGGGTCGGTTCACCTTCAGGTTTAGAGTCAGGATACCTTCACCGGCATCCTGCTG--TCCTGGCGGATGCCGAT

TAAACCTGAAGGTGAAGGTG-----------------------------------AACCGGCATCCTGCTG--TCCTGGCGGATGCCGAT

TAAATCTGAAGGTGAACGGGTCGGTTC----------------------------CACCGGCATCCTGCTG--TCCTGGCGGATGCCGAT

***ptprq*-T2**

GAATTTAGGATGCTGCAGATATTTTATCCCGTG--------GGACTCCGAGCCCATCCCAGACTTCCC

GAATTTAGGATGCAGCAGATATTTTATCCCG------------------AGCCCATCCCAGACTTCCC

GAATTTAGGATGCAGCAGATATTTTATCCCG------------ACTCCGAGCCCATCCCAGACTTCCC

GAATTTAGGATGCAGCAGATATTTTATCCCG-----------GACTCCGAGCCCATCCCAGACTTCCC

GAATTTAGGATGCAGCAGATATTTTATCCCGT------------------GCCCATCCCAGACTTCCC

GAATTTAGGATGCAGCAGATATTTTATCCCGTG--------GGACTCCGAGCCCATCCCAGACTTCCC

GAATTTAGGATGCAGCAGATATTTTATCCCGTGCC------CATCTCCGAGCCCATCCCAGACTTCCC

GAATTTAGGATGCAGCAGATATTTTATCCCGTGCCCATCCCAGACTCCGAGCCCATCCCAGACTTCCC

GAATTTAGGATGCAGCAGATATTTTATCCCGTGCCCG----GGACTCCGAGCCCATCCCAGACTTCCC

***tecta*-T1**

AGGAGCGGCTGTCACTGAGGGGGAAAGCCTC-------------------------TGGAGTGAACTGACTCACCTGAATGTTGA

AGGAGCGGCTGTCACTGAGA-------------------------------TTACTGAGAGTGAACTGACTCACCTGAATGTTGA

AGGAGCGGCTGTCACTGAGGGG----------------------------------------GAACTGACTCACCTGAATGTTGA

AGGAGCGGCTGTCACTGAGGGGGAAAGC---------------------------------TGAACTGACTCACCTGAATGTTGA

AGGAGCGGCTGTCACTGAGGGGGAAAGCCT-----------------------------------CTGACTCACCTGAATGTTGA

AGGAGCGGCTGTCACTGAGGGGGAAAGCCT------------------------------GTGAACTGACTCACCTGAATGTTGA

AGGAGCGGCTGTCACTGAGGGGGAAAGCCTC------------------------------TGAACTGACTCACCTGAATGTTGA

AGGAGCGGCTGTCACTGAGGGGGAAAGCCTC---------------------------TGGTGAACTGACTCACCTGAATGTTGA

AGGAGCGGCTGTCACTGAGGGGGAAAGCCTC--------------------------AAAGTGAACTGACTCACCTGAATGTTGA

AGGAGCGGCTGTCACTGAGGGGGAAAGCCTC--------------------------TGAGTGAACTGACTCACCTGAATGTTGA

AGGAGCGGCTGTCACTGAGGGGGAAAGCCTC-----------------CATAAGGGGAAAGTGAACTGACTCACCTGAATGTTGA

AGGAGCGGCTGTCACTGAGGGGGAAAGCCTC-----------------TGACTCACCTGAGTGAACTGACTCACCTGAATGTTGA

AGGAGCGGCTGTCACTGAGGGGGAAAGCCTCTG------------------TGAACTGGAGTGAACTGACTCACCTGAATGTTGA

AGGAGCGGCTGTCACTGAGGGGGAAAGCCTCTGACACATTGAGAGAAATAGAGATTTGAGGTGAACTGACTCACCTGAATGTTGA

AGGAGCGGCTGTCACTGAGGGGGAAAGCCTGGGTT---------TAGGGGTAGAATTGAAGTGAACTGACTCACCTGAATGTTGA

AGGAGCGGCTGTCACTGAGGGGGAAAGCCTT---------------------------GAGTGAACTGACTCACCTGAATGTTGA

***tjp2b*-T1**

AAGCCCTGCTGGAAGCTATAGCCGGGA-----------CCAGGGCTACGACACGCGGAGGTATGACACGCA

--------------------------------------CCAGGGCTACGACACGCGGAGGTATGACACGCA

AAGCCCTGCTGGAAG--------------------------GGAC--CGACACGCGGAGGTATGACACGCA

AAGCCCTGCTGGAAGCCA-----------------------GGGCTACGACACGCGGAGGTATGACACGCA

AAGCCCTGCTGGAAGCTATAGCC-------------------GGCTACGACACGCGGAGGTATGACACGCA

AAGCCCTGCTGGAAGCTATAGCC------------------GGGCTACGACACGCGGAGGTATGACACGCA

AAGCCCTGCTGGAAGCTATAGCC-----------------AGGGCTACGACACGCGGAGGTATGACACGCA

AAGCCCTGCTGGAAGCTATAGCC---------------TATAGGCTACGACACGCGGAGGTATGACACGCA

AAGCCCTGCTGGAAGCTATAGCCG-----------------GGGCTACGACACGCGGAGGTATGACACGCA

AAGCCCTGCTGGAAGCTATAGCCGGGAC----------CCAGGGCTACGACACGCGGAGGTATGACACGCA

AAGCCCTGCTGGAAGCTATAGCCGGGACA---------CCAGGGCTACGACACGCGGAGGTATGACACGCA

AAGCCCTGCTGGAAGCTATAGCCGGGACTATA----GCCCAGGGCTACGACACGCGGAGGTATGACACGCA

AAGCCCTGCTGGAAGCTATAGCCGGGCTACGACTATAGCCAGGGCTACGACACGCGGAGGTATGACACGCA

AAGCCT----------------------------------AGGGCTACGACACGCGGAGGTATGACACGCA

***tjp2b*-T2**

ATCCAGCTCAGGAGGAGAGAGTAGAAC------CACAGGATGAAGAGCCACCACCACCGCCACCAC

ATCCAGCACAGGAAGA---------------------------AGAGCCACCACCACCGCCACCAC

ATCCAGCTCAGGA---------------------------TGAAGAGCCACCACCACCGCCACCAC

ATCCAGCTCAGGAAGAGCCACAGGAAGAGC---CACAGGAAGAAGAGCCACCACCACCGCCACCAC

ATCCAGCTCAGGAGGA----------------------------GAGCCACCACCACCGCCACCAC

ATCCAGCTCAGGAGGAG--------------------------AGAGCCACCACCACCGCCACCAC

ATCCAGCTCAGGAGGAGAGAGATGAAGAGGATGAAGAGGATGAAGAGCCACCACCACCGCCACCAC

ATCCAGCTCAGGAGGAGAGAGTAGAA------------------GAGCCACCACCACCGCCACCAC

ATCCAGCTCAGGAGGAGAGAGTAGAA----------CAGAAGAAGAGCCACCACCACCGCCACCAC

ATCCAGCTCAGGAGGAGAGAGTAGAA---------CAGGAAGAAGAGCCACCACCACCGCCACCAC

ATCCAGCTCAGGAGGAGAGAGTAGAA---------CAGGATGAAGAGCCACCACCACCGCCACCAC

ATCCAGCTCAGGAGGAGAGAGTAGAA-------CACAGGAAGAAGAGCCACCACCACCGCCACCAC

ATCCAGCTCAGGAGGAGAGAGTAGAA-------CACAGGATGAAGAGCCACCACCACCGCCACCAC

ATCCAGCTCAGGAGGAGAGAGTAGAACTTG-TACACAGGAAGAAGAGCCACCACCACCGCCACCAC

ATCTAG---------------------------------AAGAAGAGCCACCACCACCGCCACCAC

***tks5a*-T1**

GTGAGCCCATGGTGCTGGAGCAGTACG-------TGGTGGTGGCCAACTACGAGAGGCAGGAAAACT

GTGAGCCCATGG---------------------------------------------CAGGAAAACT

GTGAGCCCATGGTGC----------------------TGGTGGCCAACTACGAGAGGCAGGAAAACT

GTGAGCCCATGGTGCAGGAGCAGTACACATGTACTGGTGGTGGCCAACTACGAGAGGCAGGAAAACT

GTGAGCCCATGGTGCTGGAGCAG-------------GTGGTGGCCAACTACGAGAGGCAGGAAAACT

GTGAGCCCATGGTGCTGGAGCAGTA---------CGGTGGTGGCCAACTACGAGAGGCAGGAAAACT

GTGAGCCCATGGTGCTGGAGCAGTA---------TGGTGGTGGCCAACTACGAGAGGCAGGAAAACT

GTGAGCCCATGGTGCTGGAGCAGTACACATGTACTGGTGGTGGCCAACTACGAGAGGCAGGAAAACT

GTGAGCCCATGGTGCTGGAGCAGTACGC--------GTGGTGGCCAACTACGAGAGGCAGGAAAACT

***tks5a***-T2

AGGACATTCAGACTGACGGAGAAGCCACCACCC-----------------CTGAGCGCCACATCTCCAAAAGTGAAA

AGGACATTCAGACTGACGGAG----------------------------------CGCCACATCTCCAAAAGTGAAA

AGGACATTCAGACTGACGGAGAAGCCAACACCC------------------TGAGCGCCACATCTCCAAAAGTGAAA

AGGACATTCAGACTGACGGAGAAGCCACCAC----------------------------------CCAAAAGTGAAA

AGGACATTCAGACTGACGGAGAAGCCACCACCA---GTATTGGTTAAAACCTGAGCGCCACATCTCCAAAAGTGAAA

AGGACATTCAGACTGACGGAGAAGCCACCACCCAAACAAGCAGTGTTCATTGTTGCGCCACATCTCCAAAAGTGAAA

AGGACGTTCAGACTGACGGAGAAGCCACCAC----------------------------------CCAAAAGTGAAA

***tmc1*-T1**

CAGAGCACCAGGAAGTTGGCCAGCA-------------------------CTCTGAGGAATCTTGTCAGGTGGATGTTGTCATCT

CAGAGCACCAAGAATTTGGCCAGCA---------------------------CTGAAGGATCTTGTCAGGTGAATGATGTCATCT

CAGAGCACCAGGAAGTTGG---------------------------------CTGAGGAATCTTGTCAGGTGGATGTTGTCATCT

CAGAGCACCAGGAAGTTGGCCA----------------------------------GGAATCTTGTCAGGTGGATGTTGTCATCT

CAGAGCACCAGGAAGTTGGCCAGCA-------------------------------GGAATCTTGTCAGGTGAATGTTGTCATCT

CAGAGCACCAGGAAGTTGGCCAGCA-------------------------------GGAATCTTGTCAGGTGGATGTTGTCATCT

CAGAGCACCAGGAAGTTGGCCAGCA---------------------------ATGAGGAATCTTGTCAGGTGGATGTTGTCATCT

CAGAGCACCAGGAAGTTGGCCAGCA---------------------------CTGAGGAATCTTGTCAGGTGAATGTTGTCATCT

CAGAGCACCAGGAAGTTGGCCAGCA---------------------------CTGAGGAATCTTGTCAGGTGGATGTTGTCATCT

CAGAGCACCAGGAAGTTGGCCAGCA------------------------CTTCTGAGGAATCTTGTCAGGTGAATGTTGTCATCT

CAGAGCACCAGGAAGTTGGCCAGCA------------------------CTTCTGAGGAATCTTGTCAGGTGGATGTTGTCATCT

CAGAGCACCAGGAAGTTGGCCAGCA----------------------GGAATCTGAGGAATCTTGTCAGGTGGATGTTGTCATCT

CAGAGCACCAGGAAGTTGGCCAGCA----------------CTTGCTTAATAATGAGGAATCTTGTCAGGTGGATGTTGTCATCT

CAGAGCACCAGGAAGTTGGCCAGCA---------CGGAAGTTGGAAGTTGGCCTGAGGAATCTTGTCAGGTGGATGTTGTCATCT

CAGAGCACCAGGAAGTTGGCCAGCATCTTGTTGGCCAGCATCTTGCCAGCATCTGAGGAATCTTGTCAGGTGGATGTTGTCATCT

CAGAGCACCAGGAAGTTGGCCAGGA--------------------AGTTGGCCTGAGGAATCTTGTCAGGTGAATGTTGTCATCT

***tmc1*-T2**

AGGAGCAGTCGAGTTGTCTGGCACAGTCCC--ATTGTACAAGTTGGCCTGCCAGATTGTCAT

AGGAGCAGTCGAGTTGTCTGGC----------ACAGTACAAGTTGGCCTGCCAGATTGTCAT

AGGAGCAGTCGAGTTGTCTGGCACAGTC----CCATTACAAGTTGGCCTGCCAGATTGTCAT

AGGAGCAGTCGAGTTGTCTGGCACAGTCCCATACAGTACAAGTTGGCCTGCCAGATTGTCAT

***man2a1*-T1**

CTGGCATCACCCAGCCTCCTGTAGCCACCTCCAGCT------------------GACCGTTCTCTACCAGCCTGCACA

CTGGCATCACCCAGCCTCCTG----------------------------------------------CAGCCTGCACA

CTGGCATCACCCAGCCTCCTGTAGCCACCT------------------------------------CCAGCCTGCACA

CTGGCATCACCCAGCCTCCTGTAGCCACCT-------------------------------CTCTACCAGCCTGCACA

CTGGCATCACCCAGCCTCCTGTAGCCACCT------------------------GACCGTTCTCTACCAGCCTGCACA

CTGGCATCACCCAGCCTCCTGTAGCCACCTCCA--------------------------TTCTCTACCAGCCTGCACA

CTGGCATCACCCAGCCTCCTGTAGCCACCTCCA-------------------------GTTCTCTACCAGCCTGCACA

CTGGCATCACCCAGCCTCCTGTAGCCACCTCCACCGTT----------------GACCGTTCTCTACCAGCCTGCACA

CTGGCATCACCCAGCCTCCTGTAGCCACCTCCACCTCCT---------------GACCGTTCTCTACCAGCCTGCACA

CTGGCATCACCCAGCCTCCTGTAGCCACCTCCAG--------------------GACCGTTCTCTACCAGCCTGCACA

CTGGCATCACCCAGCCTCCTGTAGCCACCTCCAGGCT-----------------GACCGTTCTCTACCAGCCTGCACA

CTGGCATCACCCAGCCTCCTGTAGCCACCTCCGTTCTCCGTTCTCCGTTCTGTAGACCGTTCTCTACCAGCCTGCACA

CTGGCATCACCCAGCCTCCTGTAGCCACCTCCTGTAGCT---------------GACCGTTCTCTACCAGCCTGCACA

CTGGCATCACCCAGCCTCCTGTAGCCACCTGTAGCT------------------GACCGTTCTCTACCAGCCTGCACA

CTGGCATCACCCAGCCTCCTGTAGCT----------------------------GACCGTTCTCTACCAGCCTGCACA

***man2a1*-T2**

AATTCTCCAT----------GGACAGCTAATTCTTCC--------TCCTGGCAGCCTTTTAAAATCAAACTGGCAGCA

AATTCTCCAT----------GGACAGCTAATC---------------CTGGCAGCCTTTTAAAATCAAACTGGCAGCA

AATTCTCCAT----------GGACAGCTAATT-----------------------CTTTTAAAATCAAACTGGCAGCA

AATTCTCCAT----------GGACAGCTAATT---------------CTGGCAGCCTTTTAAAATCAAACTGGCAGCA

AATTCTCCAT----------GGACAGCTAATT---------------CTTCCTGCCTTTTAAAATCAAACTGGCAGCA

AATTCTCCAT----------GGACAGCTAATT--------------CCTGGCAGCCTTTTAAAATCAAACTGGCAGCA

AATTCTCCAT----------GGACAGCTAATT--------------TCAAACAGCCTTTTAAAATCAAACTGGCAGCA

AATTCTCCAT----------GGACAGCTAATTC------------------------TTTAAAATCAAACTGGCAGCA

AATTCTCCAT----------GGACAGCTAATTC------------TCCTGGCAGCCTTTTAAAATCAAACTGGCAGCA

AATTCTCCAT----------GGACAGCTAATTC------------TTCTGGCAGCCTTTTAAAATCAAACTGGCAGCA

AATTCTCCAT----------GGACAGCTAATTCT-----------TCCTGGCAGCCTTTTAAAATCAAACTGGCAGCA

AATTCTCCAT----------GGACAGCTAATTCTG----------TCCTGGCAGCCTTTTAAAATCAAACTGGCAGCA

AATTCTCCATGGACAATTCAGGACAGCTAATTCTTGTCCTGGCAATCCTGGCAGCCTTTTAAAATCAAACTGGCAGCA

***man2b1*-T1**

CGTGTGTTCTGGTTCTGCTGTCTCC-----------------ACCAGCGGTAAAAGAAGGCCGTCTCAACATAGATA

CGTGTGTTCTGGTTCTGCTGTCTCC---------------------ACGGTAAAAGAAGGCCGTCTCAACATAGATA

CGTGTGTTCTGGTTCTGCTGTCTCC--------------------AGCGGTAAAAGAAGGCCGTCTCAACATAGATA

CGTGTGTTCTGGTTCTGCTGTCTCCAG--------------AACCTTCGGTAAAAGAAGGCCGTCTCAACATAGATA

CGTGTGTTCTGGTTCTGCTGTCTCCTGTGTTCTGGTTCTGCTGTCAGCGGTAAAAGAAGGCCGTCTCAACATAGATA

***man2b1*-T2**

C-GGTCCTTGTCCTGGTAGTCCAAGCGGCCAAAG---------------AAGAAGCCGTCATAGCCCATCTATAAA

C-GGTCCTTGTCCT-GTAGTCCAAGCGGCCAAAG----------------------CTTTAAACAAAATCTATAAA

C-GGTCCTTGTCCTGGTAGTCCAA--------------------------AGAAGCCGTCATAGCCCATCTATAAA

C-GGTCCTTGTCCTGGTAGTCCAAGCAGCCAAAG----------------------AGTCATAGCCCATCTATAAA

C-GGTCCTTGTCCTGGTAGTCCAAGCGGCCA---------------------AAGCCGTCATAGCCCATCTATAAA

C-GGTCCTTGTCCTGGTAGTCCAAGCGGCCA------------------AAGAAGCCGTCATAGCCCATCTATAAA

C-GGTCCTTGTCCTGGTAGTCCAAGCGGCCAA------------------AGAAGCCGTCATAGCCCATCTATAAA

C-GGTCCTTGTCCTGGTAGTCCAAGCGGCCAA------------------AGTAGCCGTCATAGCCCATCTATAAA

C-GGTCCTTGTCCTGGTAGTCCAAGCGGCCAAAG--------------------------ATAGCCCATCTATAAA

C-GGTCCTTGTCCTGGTAGTCCAAGCGGCCAAAG----------------------CTTTAAACAAAATCTATAAA

C-GGTCCTTGTCCTGGTAGTCCAAGCGGCCAAAG----------------AGAAGCCGTCATAGCCCATCTATAAA

C-GGTCCTTGTCCTGGTAGTCCAAGCGGCCAAAG----------------AGAAGCCGTCATAGCCCATCTATAAG

C-GGTCCTTGTCCTGGTAGTCCAAGCGGCCAAAG---------------AAGAAGCCGTCATAGCCCACCTATAAA

C-GGTCCTTGTCCTGGTAGTCCAAGCGGCCAAAG---------------AAGAAGCCGTCATAGCCCATCTATAA-

C-GGTCCTTGTCCTGGTAGTCCAAGCGGCCAAAGGAATAAGGCCAAAGAAAGAAGCCGTCATAGCCCATCTATAAA

CAGGTCCTTGTCCTGGTAGTCCAA--------------------------AGAAGCCGTCATAGCCCATCTATAAA

***mgat4b*-T1**

CTTGCTCAGCGGAGTGCAGACGGTCTC---------------------------TCAGGGCCAGAAACTCACGCTGGTAAATGTCCA

------------------------------------------------------TCAGGGCCAGAAACTCACGCTGGTAAATGTCCA

CTTGCTCAGCGGAGTGCA---------------------------------------GGGCCAGAAACTCACGCTGGTAAATGTCCA

CTTGCTCAGCGGAGTGCAGAC-------------------------------------GGCCAGAAACTCACGCTGGTAAATGTCCA

CTTGCTCAGCGGAGTGCAGACGG-------------------------------TCAGGGCCAGAAACTCACGCTGGTAAATGTCCA

CTTGCTCAGCGGAGTGCAGACGGT------------------------------GCAGGGCCAGAAACTCACGCTGGTAAATGTCCA

CTTGCTCAGCGGAGTGCAGACGGTC-----------------------------TCAAGGCCAGAAACTCACGCTGGTAAATGTCCA

CTTGCTCAGCGGAGTGCAGACGGTC-----------------------------TCAGGGCCAGAAACTCACGCTGGTAAATGTCCA

CTTGCTCAGCGGAGTGCAGACGGTCT-------------------------------GGGCCAGAAACTCACGCTGGTAAATGTCCA

CTTGCTCAGCGGAGTGCAGACGGTCT----------------------------TCAGGGCCAGAAACTCACGCTGGTAAATGTCCA

CTTGCTCAGCGGAGTGCAGACGGTCTCAG-------------------------AAAGGGCCAGAAACTCACGCTGGTAAATGTCCA

CTTGCTCAGCGGAGTGCAGACGGTCTCCTATACA------------CATAGGTTTCAGGGCCAGAAACTCACGCTGGTAAATGTCCA

CTTGCTCAGCGGAGTGCAGACGGTCTCGG-----------------GTGAGT--TTCGGGCCAGAAACTCACGCTGGTAAATGTCCA

CTTGCTCAGCGGAGTGCAGACGGTCTCTGCAGACGGTCTCTGCAGACGGTCTCTGCAGGGCCAGAAACTCACGCTGGTAAATGTCCA

CTTGCTCAGCGGAGTGCAGACGGTCTCTGGGCCAGAAACTCACGCCAGAAAC--TCAGGGCCAGAAACTCACGCTGGTAAATGTCCA

CTTGCTCAGCGGAGTGCAGACGGTCTCTTGCTCAG-----------CGGAGT--GCAGGGCCAGAAACTCACGCTGGTAAATGTCCA

CTTGCTCAGCGGAGTGCAGACGGTCTTTCAGAC-------------GGAGTT--TCAGGGCCAGAAACTCACGCTGGTAAATGTCCA

***mgat4b*-T2**

CTCCGGTGCGACCCTGGCCGATGTGCACC--GCCGGC------------------TG-----------------------------------AAGGCTGCTCTCCTTGGCCAGCA

CTCCGGTGCGACCCTGGCCGATGTGCAC---------------------------TG-----------------------------------AAGGCTGCTCTCCTTGGCCAGCA

CTCCGGTGCGACCCTGGCCGATGTGCACA--GC----------------------TG-----------------------------------AAGGCTGCTCTCCTTGGCCAGCA

CTCCGGTGCGACCCTGGCCGATGTGCACC--------------------------TG-----------------------------------AAGGCTGCTCTCCTTGGCCAGCA

CTCCGGTGCGACCCTGGCCGATGTGCACC--ACCGC-------------------TG-----------------------------------AAGGCTGCTCTCCTTGGCCAGCA

CTCCGGTGCGACCCTGGCCGATGTGCACC--GATG--------------------TG-----------------------------------AAGGCTGCTCTCCTTGGCCAGCA

CTCCGGTGCGACCCTGGCCGATGTGCACC--GC----------------------TG-----------------------------------AAGGCTGCTCTCCTTGGCCAGCA

CTCCGGTGCGACCCTGGCCGATGTGCACC--GCC------------------------------------------------------------GGCTGCTCTCCTTGGCCAGCA

CTCCGGTGCGACCCTGGCCGATGTGCACC--GCC----------------------------------------------------------AGGGCTGCTCTCCTTGGCCAGCA

CTCCGGTGCGACCCTGGCCGATGTGCACC--GCCCGCCAGCAAA-----------TG-------------------------------------------------TGGCCAGCA

CTCCGGTGCGACCCTGGCCGATGTGCACC--GCCGA-------------------TGT----------------------------------GCACCGGCTCTCCTTGGCCAGCA

CTCCGGTGCGACCCTGGCCGATGTGCACC--GCCGAAGGC---------------TG-----------------------------------AAGGCTGCTCTCCTTGGCCAGCA

CTCCGGTGCGACCCTGGCCGATGTGCACC--GCCGAAGGCTGTGCACATGAAGGCTGAGCAGCTG---------------------------AAGGCTGCTCTCCTTGGCCAGCA

CTCCGGTGCGACCCTGGCCGATGTGCACC--GCCGATG-----------------TG-----------------------------------AAGGCTGCTCTCCTTGGCCAGCA

CTCCGGTGCGACCCTGGCCGATGTGCACC--GCCGC-------------------TG-----------------------------------GTGGT---------------GCA

CTCCGGTGCGACCCTGGCCGATGTGCACC--GCCGCCGC----------------TG-----------------------------------AAGGCTGCTCTCCTTGGCCAGCA

CTCCGGTGCGACCCTGGCCGATGTGCACC--GCCGCTGAAGGAGACAACTGAAGCTG-----------------------------------AAGGCTGCTCTCCTTGGCCAGCA

CTCCGGTGCGACCCTGGCCGATGTGCACC--GCCGCTGCTCTCCT----------TGGCCAGCAAATGTGAGAGGCTGAAAAAAAAAAAGGAGAGGCTGCTCTCCTTGGCCAGCA

CTCCGGTGCGACCCTGGCCGATGTGCACC--GCCGGTTGC---------------TG-----------------------------------AAGGCTGCTCTCCTTGGCCAGCA

CTCCGGTGCGACCCTGGCCGATGTGCACC--GCCTC-------------------TG-----------------------------------AAGGCTGCTCTCCTTGGCCAGCA

CTCCGGTGCGACCCTGGCCGATGTGCACCTGGCCGATGAGCATGC----------TG-----------------------------------AAGGCTGCTCTCCTTGGCCAGCA

***mgat5*-T1**

GCCAACCTGACCAACGGCACCGGGACTCCCGGA--------------------------------------CCAAACCCAGTCAACCCTGAGAAAGTC

---------------------------------------------------------------------------------TCAACCCTGAGAAAGTC

ACCAACCTGACCAACGGCACCGGGACTCCC-------------------------------------------AAACCCAGTCAACCCTGAGAAAGTC

ACCAACCTGACCAACGGCACCGGGACTCCCGGA--------------------------------------GAAA-----GTCAACCCTGAGAAAGTC

ACCAACCTGACCAACGGCACCGGGACTCCCGGA-----------------------------------CTCCCAAACCCAGTCAACCCTGAGAAAGTC

ACCAACCTGACCAACGGCACCGGGACTCCCGGG------------------------ACACCCAGTTGACGGGACACCCAGTCAACCCTGAGAAAGTC

GCCAACCTGACCAACGGCACCGGGACTCCC-------------------------------------------------AGTCAACCCTGAGAAAGTC

GCCAACCTGACCAACGGCACCGGGACTCCCGG-------------------------------------------------TCAACCCTGAGAAAGTC

GCCAACCTGACCAACGGCACCGGGACTCCCGG---------------------------------------TCAAACCCAGTCAACCCTGAGAAAGTC

GCCAACCTGACCAACGGCACCGGGACTCCCGGA-----------------------------------------AACCCTGTCAACCCTGAGAAAGTC

GCCAACCTGACCAACGGCACCGGGACTCCCGGA--------------------------------------GAAAGTCC---CAACCCTGAGAAAGTC

GCCAACCTGACCAACGGCACCGGGACTCCCGGA------------------------------------TGCCAAACCCAGTCAACCCTGAGAAAGTC

GCCAACCTGACCAACGGCACCGGGACTCCCGGAGAAAACCCAGGACCTCCCAGAAAACCGGGACTCCCGGAGAAAACCCAGTCAACCCTGAGAAAGTC

***mgat5*-T2**

GGTTCACCTGGGCTTGTTGACGAAGGAGTCT--------GGTTTTAAGATAGCGGAGAATGCGTTCAG

GG-TCACCTGGGCTTGTTGACGAAGGAGTCT--------GGTTTTAAGATAGCGGAGAATGCGTTCAG

GG-TTACCTGGGCTTGTTGACGAAGGAGTCT--------GGTTTTAAGATAGCGGAGAATGCGTTCAG

GGTTCACCTGGGCTTGTTGACGAAGG--TCT--------GGTTTTAAGATAGCGGAGAATGCGTTCAG

GGTTCACCTGGGCTTGTTGACGAAGGAGTCT--------GG-TTTAAGATAGCGGAGAATGCGTTCAG

GGTTCACCTGGGCTTGTTGACGAAGGATTTA--------AGATCTAAGATAGCGGAGAATGCGTTCAG

GGTTCACCTGGGCTTGTTGACGAAGGTTTTTAAGATAGCGGTTTTAAGATAGCGGAGAATGCGTTCAG

GGTTCACCTGGGTCTGCTGACGAAGGAGTCT--------GGTTTTAAGATAGCGGAGAATGCGTTCAG

GT-TCACCTGGGCTTGTTGACGAAGGAGTCT--------GGTTTTAAGATAGCGGAGAATGCGTTCAG

***man1a1*-T1**

ACAATTACAAGCACTACGCCTGGGGATCCAACG------------------AGCTGCGGCCTGTCTCCAAGCAAGGCC

ACAATTACAAGCACAACGCCTGGGGATCCAG----------------------CTGCGGCCTGTCTCCAAGCAAGGCC

ACAATTACAAGCACTACG-----------------------------------CTGCGGCCTGTCTCCAAGCAAGGCC

ACAATTACAAGCACTACGCCTG----------------------------------CGGCCTGTCTCCAAGCAAGGCC

ACAATTACAAGCACTACGCCTG-GGATCCAACG------------------AGCTGCGGCCTGTCTCCAAGCAAGGCC

ACAATTACAAGCACTACGCCTGGGGATC-------------------------------------------CAAGGCC

ACAATTACAAGCACTACGCCTGGGGATCCAA-------------------------CGGCCTGTCTCCAAGCAAGGCC

ACAATTACAAGCACTACGCCTGGGGATCCAA----------------------CGGCGGCCTGTCTCCAAGCAAGGCC

ACAATTACAAGCACTACGCCTGGGGATCCAA----------------------CTGCGGCCTGTCTCCAAGCAAGGCC

ACAATTACAAGCACTACGCCTGGGGATCCAAC-------------------AGCTGCGGCCTGTCTCCAAGCAAGGCC

ACAATTACAAGCACTACGCCTGGGGATCCAACG------------------------GGCCTGTCTCCAAGCAAGGCC

ACAATTACAAGCACTACGCCTGGGGATCCAACG------------------GCCTGCGGCCTGTCTCCAAGCAAGGCC

ACAATTACAAGCACTACGCCTGGGGATCCAACGGCTGTCTTGCTTGGAGACAGCTGCGGCCTGTCTCCAAGCAAGGCC

ACAATTACAAGCACTACGCCTGGGGATCCAACGGGCGTACATC-----GCAAGCTGCGGCCTGTCTCCAAGCAAGGCC

ACAATTACAAGCACTACGCCTGGGGATCCAATG------------------AGCTGCGGCCTGTCTCCAAGCAAGGCC

ACAATTACAAGCACTACGCCTGGGGATCCAG----------------------CTGCGGCCTGTCTCCAAGCAAGGCC

***man1a*-T2**

CCTTTAGTGGGGTCGGCAGAAACTGGCCATG------------------GGCATCAGGAGGAAGCAGCATTCTGGCCG

CCTTTAGT-----------------------------------------GGCATCAGGAGGAAGCAGCATTCTGGCCG

CCTTTAGTGGGGTCGGCAGAAACG-------------------------GGCATCAGGAGGAAGCAGCATTCTGGCAG

CCTTTAGTGGGGTCGGCAGAAACG-------------------------GGCATCAGGAGGAAGCAGCATTCTGGCCG

CCTTTAGTGGGGTCGGCAGAAACT-------------------------GGCATCAGGAGGAAGCAGCATTCTGGCCG

CCTTTAGTGGGGTCGGCAGAAACTG------------------------GGCATCAGGAGGAAGCAGCATTCTGGCCG

CCTTTAGTGGGGTCGGCAGAAACTGGCATG-------------------GGCATCAGGAGGAAGCAGCATTCTGGCCG

CCTTTAGTGGGGTCGGCAGAAACTGGCCATG------------------GGCATCAGGA-GAAGCAGCATTCTGGCCG

CCTTTAGTGGGGTCGGCAGAAACTGGCCATG------------------GGCATCAGGAGGAAGTAGCATTCTGGCCG

CCTTTAGTGGGGTCGGCAGAAACTGGCTAATGCTGCGTTCACAACAAAGGGCATCAGGAGGAAGCAGCATTCTGGCCG

CCTTTAGTGGGGTCGGCAGAAACTGGCTTTGGC-----------CCATGGGCATCAGGAGGAAGCAGCATTCTGGCCG

CCTTTAGTGGGGTCGGCAGAAACTGTCTG--------------------GGCATCAGGAGGAAGCAGCATTCTGGCCG

***mgat1b*-T1**

TCTCCAGTTCCGATTCTACTTCTTCAGCCAATCT-----------GATCACTTCACCGGCCAATCCGTTAG

TCTAGTGT-----------------------------------------AAAACGACGGCCAGTC------

TCTCCAGTTCCGATTCTACTTCTCCAGTTC--------------CGATCACTTCACCGGCCAATCCGTTAG

TCTCCAGTTCCGATTCTACTTCTTCAG-------------------ATCACTTCACCGGCCAATCCGTTAG

TCTCCAGTTCCGATTCTACTTCTTCAGCCA---------------------ATCACCGGCCAATCCGTTAG

TCTCCAGTTCCGATTCTACTTCTTCAGCCA----------------ATCACTTCACCGGCCAATCCGTTAG

TCTCCAGTTCCGATTCTACTTCTTCAGCCA----------------ATCACTTCACCGGCCAATCCGTTGG

TCTCCAGTTCCGATTCTACTTCTTCAGCCAA--------------GATCACTTCACCGGCCAATCCGTTAG

TCTCCAGTTCCGATTCTACTTCTTCAGCCAACTGAAGAAGATGA-----ACTTCACCGGCCAATCCGTTAG

TCTCCAGTTCCGATTCTACTTCTTCAGCCAATCACG---------GATCACTTCACCGGCCAATCCGTTAG

TCTCCAGTTCCGATTCTACTTCTTCAGCCAATCACTTCA------CTTCACTTCACCGGCCAATCCGTTAG

TCTCCAGTTCCGATTCTACTTCTTCAGCCAATCACTTCACCGGCCAATCACTTCACCGGCCAATCCGTTAG

TCTCCAGTTCCGATTCTACTTCTTCAGCCT---------------GATCACTTCACCGGCCAATCCGTTAG

TCTCCAGTTCT-------CGTCTCTAAGCA-----------------TCCCCCCAATGACTG---------

TCTCTTGT-----------------------------------------AAAACGACGGCCAGTC------

TCTGATGT-----------------------------------------AAAACGACGGCCAGTC------

TCTTCTGT-----------------------------------------AAAACGACGGCCAGTC------

***mgat1b*-T2**

CTGCTGGAATATTGAACTCGAAACGGTCCCGAGCCTTTCAAGCTTCCACCGTGCTGTAGT

CTGCTGGAATATTGAACTCGAAACGGTCC----------------------CGCTGTAAT

CTGCTGGAATATTGAACTCGAAACGGTCC----------------------CGCTGTAGT

CTGCTGGAATATTGAACTCGAAACGGTCC---------CAAGCTTCCACCGTGCTGTAGT

CTGCTGGAATATTGAACTCGAAACGGTCC-----CTTTCAAGCTTCCACCGTGCTGTAGT
