# Supplementary material for: High-throughput gene targeting and phenotyping in zebrafish using CRISPR/Cas9
Source: HighWire-hosted journal article supplement (doi:10.1101/gr.186379.114), 2015-06-05
Supplement: Supplemental_File_2-3.xlsx [file Supplemental_File_2-3.xlsx]

## Sheet: Supplementary File 2
Supplementary File 2
Primer Name	Primer Sequence
cav1 T1 F	TGTAAAACGACGGCCAGTGGGTGTGGTGCTTCATTTCT
cav1 T1 R	GTGTCTTTCTTTTCGTTGATGCTGTCG
cav1 T2 F	TGTAAAACGACGGCCAGTTCATCTGATCGCACTTCAGG
cav1 T2 R	GTGTCTTCACTGCCTCCGTTTGTTGAT
cav3 T1 F	TGTAAAACGACGGCCAGTGGGTCCCTGTTGATCAAGTC
cav3 T1 R	GTGTCTTCTGCCCCACTTTTTCTTCAC
cav3 T2 F	TGTAAAACGACGGCCAGTACGGCCCATATGTGACAGAA
cav3 T2 R	GTGTCTTACTAACCAGAATCGTTGCATCT
CDH2 T1 F	tgtaaaacgacggccagtTGCACTCAATCCACCATCTC
CDH2 T1 R	gtgtcttGCTTTCTTACCTGTTTGGGTTG
CDH2 T2 F	tgtaaaacgacggccagtTCATCATGTGAAGTGCAGTCAG
CDH2 T2 R	gtgtcttCATGAAAGTTGGGGATGTGTT
CDH23 T1 F	tgtaaaacgacggccagtACTCCAGTTGGGACGTCAGT
CDH23 T1 R	gtgtcttCAGACATAACAAGCGGACACA
CDH23 T2 F	tgtaaaacgacggccagtCGCCAACACAGGGAGTACAT
CDH23 T2 R	gtgtcttTTTTGCGTTTCACCTCTCTG
Coch T1 F	tgtaaaacgacggccagtCTGAACACCATGAGCGTAAGAG
Coch T1 R	gtgtcttGAGCCTCTCAGTGTTTGGTTCT
Coch T2 F	tgtaaaacgacggccagtGAATGGTGAAGCACATTACCG
Cohc T2 R	gtgtcttACACCTTCCCACACCTTTTG
col11a2 T1 F	tgtaaaacgacggccagtTCTGACTTCTTGGCTGATGC
col11a2 T1 R	gtgtcttACCAAAAGCAACTCCAGCAC
col11a2 T2 F	tgtaaaacgacggccagtGCTTGGTGTTAACAGGCCTTC
col11a2 T2 R	gtgtcttCCAAACAGCTTCCTCTGAGC
CRYM T1 F	tgtaaaacgacggccagtAGGTCGAACGTTTGCTCAGT
CRYM T1 R	gtgtcttGCCACATATGAAGGCATCAC
CRYM T2 F	tgtaaaacgacggccagtTTTTTGGGTGTGATGCCTTC
CRYM T2 R	gtgtcttCAATTTGTCAAAATCGGAATCA
ctnnb1 T1 F	TGTAAAACGACGGCCAGTCTGGTTCCAACCTGATCCTC
ctnnb1 T1 R	GTGTCTTGATGAGGGCATGCAGATACC
ctnnb1 T2 F	TGTAAAACGACGGCCAGTCAGCATCCAGCAGTGTTGTT
ctnnb1 T2 R	GTGTCTTTGCTACTGCACCAAGAAGGA
cx30.3 T1 F	tgtaaaacgacggccagtCTGAGGCAACCCCTGATAAA
cx30.3 T1 R	gtgtcttGCGGAAGATGAAGAGGACAG
cx30.3 T2 F	tgtaaaacgacggccagtGCCTTGTGAAGTGTGAGCAA
cx30.3 T2 R	gtgtcttTCTGTAGGTGCGCCTTTTCT
Cx35.4 T1 F	tgtaaaacgacggccagtCAGAGTGAGCTGGCCTTTCT
Cx35.4 T1 R	gtgtcttTGTGGGAAATGGGGAAGTAG
CX35.4.B T2 F	tgtaaaacgacggccagtGCCAAAGCAAAACTCTACGC
CX35.4.B T2 R	gtgtcttTCTCGCAGACACTGAGCACT
DFNA5 T1 F	tgtaaaacgacggccagtTGATAAATTTACATTTTTGTCCACAG
DFNA5 T1 R	gtgtcttTTTCATGCCCTCATGCTCA
DFNA5.B T2 F	tgtaaaacgacggccagtTTGGAGAGTAAAGCCACGTCA
DFNA5.B T2 R	gtgtcttTTGAATGAATAATACGCCCAAGA
espn.B T1 F	tgtaaaacgacggccagtTCTGTTGTCAATCATTCCTTGC
espn.B T1 R	gtgtcttTTACTGTGGGCTGTGTTCCA
espn.B T2 F	tgtaaaacgacggccagtTGTTGTCCCAACACCAATCT
espn.B T2 R	gtgtcttTGCTGATGTACGGGTGTGTT
espnl T1 F	tgtaaaacgacggccagtACTGGGTATTGCAGGCTGAC
espnl T1 R	gtgtcttGCTGGACATGAGCATTTTGA
espnl T2 F	tgtaaaacgacggccagtTCTGGAGCATTGGAACATGA
espnl T2 R	gtgtcttCAAAACCTTTACCCCCATCA
Eya4.B T1 F	tgtaaaacgacggccagtGTGAATCCGGATAAACAGTGAA
Eya4.B T1 R	gtgtcttAAATGTTATGATTGTGTTTGATTGG
Eya4.B T2 F	tgtaaaacgacggccagtGCACAAGGAGTAGGCTTATTTTG
Eya4.B T2 R	gtgtcttAGCTACAGATTTGGGGGTGA
Fut8 T1 F	TGTAAAACGACGGCCAGTGCCTCTGGCGTCAAATAAAG
Fut8 T1 R	GTGTCTTCATTGCTCCAGTCTCCATCA
Fut8 T2 F	TGTAAAACGACGGCCAGTTCCACAGAACCCTCAGGACT
Fut8 T2 R	GTGTCTTTCGCTGACAGGTTTAAAGACG
gmds T1 F	TGTAAAACGACGGCCAGTTACCGTGTCGGAATTGTTGA
gmds T1 R	GTGTCTTGATAAACGAACGCACACAGC
gmds T2 F	TGTAAAACGACGGCCAGTAATGGCGTGGTTTCTTTCTG
gmds T2 R	GTGTCTTTGCGTAAATGCTTTGTGTTTG
gpsm2 T1 F	tgtaaaacgacggccagtGCTCACCTTGTCACCCAGTT
gpsm2 T1 R	gtgtcttCACTCAAATAATTCCAGCAATG
gpsm2 T2 F	tgtaaaacgacggccagtTCCTGAGCGATGATGAGATG
gpsm2 T2 R	gtgtcttCGGTGCAGTTCAATCAGGA
grhl2a T1 F	tgtaaaacgacggccagtAATCCTGTAAATGCGGATGG
grhl2a T1 R	gtgtcttAGTCAAGATGGCGTCGAGTC
grhl2a T2 F	tgtaaaacgacggccagtTCCGAACACCACCATCACTA
grhl2a T2 R	gtgtcttATTGAAGCAAGCCGTTCTGT
grhl2b T1 F	tgtaaaacgacggccagtGAAGCACACCAGTGGGAAAC
grhl2b T1 R	gtgtcttATCTGCTCCTCCCCTTCTGT
grhl2b T2 F	tgtaaaacgacggccagtTCCAGCCAGGATTAGAACTGA
grhl2b T2 R	gtgtcttAACCATAAATGCCACCAGGA
HGFA T1 F	tgtaaaacgacggccagtTCCGGACCTTAAAGTTGCTT
HGFA T1 R	gtgtcttTGTTTGTGTGCTGTATGTTCTCC
HGFA T2 F	tgtaaaacgacggccagtGGCAAATTTACCATCAGCAAA
HGFA T2 R	gtgtcttGGAATTCCTGACATTCTCTTTCC
HGFB T1 F	tgtaaaacgacggccagtCATTGTTTGTGATTCTTTGGATG
HGFB T1 R	gtgtcttTCGGATTTTCAATCCTGCTC
HGFB T2 F	tgtaaaacgacggccagtGGGGCCCTCTAGTATGTCAA
HGFB T2 R	gtgtcttAGGAGCTGTTGGATTTGTGG
hif1ab T1 F	TGTAAAACGACGGCCAGTGATGTTCGAGGGATGAGGAA
hif1ab T1 R	GTGTCTTTGAAAGAGATGCAAGAACACTGA
hif1ab T2 F	TGTAAAACGACGGCCAGTTCTGGCTCCTCTTTCAGCTT
hif1ab T2 R	GTGTCTTGGGGGATGTAGTCCTGTCCT
hspa5 T1 F	TGTAAAACGACGGCCAGTGGCCTCGATAGATCCACTTG
hspa5 T1 R	GTGTCTTTACAAGAATGGCCGTGTTGA
hspa5 T2 F	TGTAAAACGACGGCCAGTTGATGAAGTGCTCCATGACG
hspa5 T2 R	GTGTCTTCGTGAGTACTCTGCTGCTGTG
hspe1 T1 F	TGTAAAACGACGGCCAGTCTGCAGAGACCGTGTCAAGA
hspe1 T1 R	GTGTCTTTTTCCCATCCTGAAAAACAGA
hyou1 T1 F	TGTAAAACGACGGCCAGTCGTGACAGGCTGTGAAGAAT
hyou1 T1 R	GTGTCTTCAACTAACGCACCTGCAAAA
hyou1 T2 F	TGTAAAACGACGGCCAGTACACTCGGTGGCTTTGAGAT
hyou1 T2 R	GTGTCTTTCCCATTACCTGTGCCGTAT
igf2bp2b T1 F	TGTAAAACGACGGCCAGTTTAGAGGCAGCTCTTGCTGA
igf2bp2b T1 R	GTGTCTTTGACAGGCCACAGTTTTTGA
igf2bp2b T2 F	TGTAAAACGACGGCCAGTGCTTGTGAACAGCCCTCTTT
igf2bp2b T2 R	GTGTCTTGGAATTTCATGATGGGTGCT
igfbp7 T1 F	TGTAAAACGACGGCCAGTGACTCAGTGCGCTCCTCTG
igfbp7 T1 R	GTGTCTTTCCCGCTTTTGCTCTTCTTA
igfbp7 T2 F	TGTAAAACGACGGCCAGTGCTTCATTATGCCGCTCTTT
igfbp7 T2 R	GTGTCTTTCGTCCAGAACACACACATCC
ildr1a T1 F	tgtaaaacgacggccagtTCCAGCGTATCAGTCTGCTC
ildr1a T1 R	gtgtcttTGTGCTCTGAGTAAGTGTGTGTG
ildr1a T2 F	tgtaaaacgacggccagtCATGATCACACAATCAGACTGC
ildr1a T2 R	gtgtcttGCAGGAGGCAGTGATCTACC
ildr1b T1 F	tgtaaaacgacggccagtGGTACTCCGTTCCCAGAACA
ildr1b T1 R	gtgtcttACTACTCCGCTGGTGAGTGC
ildr1b T2 F	tgtaaaacgacggccagtATACCTTTTTCAGGGCAGCA
ildr1b T2 R	gtgtcttGCCAACTGAAGACTGGCTTT
junba T1 F	TGTAAAACGACGGCCAGTGATGCTCCGACCGTACAAAT
junba T1 R	GTGTCTTAAAGCAGAACATGAGCGTGA
junbb T1 F	TGTAAAACGACGGCCAGTGCTCAAGGAGCAGTTTCCAC
junbb T1 R	GTGTCTTCGTCTGGATGATGAGCCTCT
junbb T2 F	TGTAAAACGACGGCCAGTCCTTCTCGGACGGTTTTACA
junbb T2 R	GTGTCTTCTCGGTCACGTTCAAGTTCA
krt15 T1 F	TGTAAAACGACGGCCAGTTTGAAGGATGGATTGTTCCAG
krt15 T1 R	GTGTCTTGAGGGCTTAAAGGAGGAGCTT
krt15 T2 F	TGTAAAACGACGGCCAGTAGGTTCTGCATGGTTGCTTT
krt15 T2 R	GTGTCTTGTGGGGTCCGTATCTCCTCT
lhfpl5a T1 F	tgtaaaacgacggccagtCACGATCAGCAGCAAAGAGA
lhfpl5a T1 R	gtgtcttGGACCATCTTCACCATCTGC
lhfpl5a T2 F	tgtaaaacgacggccagtGATCCAGTAGGGCTGGATGA
lhfpl5a T2 R	gtgtcttGAGGACATCCGGCAGAATTA
lhfpl5b T1 F	tgtaaaacgacggccagtCACGATCAGCAGCAAAGAGA
lhfpl5b T1 R	gtgtcttGGACCATCTTCACCATCTGC
lhfpl5b T2 F	tgtaaaacgacggccagtACCAATCCAATACGGCTGAA
lhfpl5b T2 R	gtgtcttTCACCTGCCTTTGAAGATCA
loxhd1a T1 F	tgtaaaacgacggccagtGTTTGCTGGTGTTCATGTGG
loxhd1a T1 R	gtgtcttCAGTTGATGCCAGCATTGTC
loxhd1a T2 F	tgtaaaacgacggccagtTGCCGTTTGTGATTTTTCTC
loxhd1a T2 R	gtgtcttAAATTGGGAACCTTTCTGCTC
loxhd1b T1 F	tgtaaaacgacggccagtTGCTCAGATTAGCTCAGAAAGG
loxhd1b T1 R	gtgtcttATGGCCCCTAATGTGTGTGT
loxhd1b T2 F	tgtaaaacgacggccagtAAATGAAGCTAATTTCATATTTGTGTT
loxhd1b T2 R	gtgtcttTCTGGACAGCGTTCAGATTG
man1a1 T1 F	TGTAAAACGACGGCCAGTCCTCAGATGATGCAGTTTGC
man1a1 T1 R	GTGTCTTTTATCTGTGTGGCGTGAAGC
man1a1 T2 F	TGTAAAACGACGGCCAGTAACGGTCATTAGCCAATCAGA
man1a1 T2 R	GTGTCTTCGGCTGAACTGATGCTTACC
man1b1 T1 F	TGTAAAACGACGGCCAGTCTGGGTTTCTGAAGCTCTGG
man1b1 T1 R	GTGTCTTGATCGGTCATTGAAGGAGGA
man1b1 T2 F	TGTAAAACGACGGCCAGTTCTGCAAGAACAGGAACACAA
man1b1 T2 R	GTGTCTTTCCAATATCCACTGCTGAACA
man2a1 T1 F	TGTAAAACGACGGCCAGTCCCAAATTTCTCTCCAACCA
man2a1 T1 R	GTGTCTTTGCATGCAGTTTCATGTTGA
man2a1 T2 F	TGTAAAACGACGGCCAGTAGCTCCTACTGTGTTTGACTGC
man2a1 T2 R	GTGTCTTTGCCACATGATGCCATTCTA
man2b1 T1 F	TGTAAAACGACGGCCAGTCAAAACAAAACCCCTCCTCAC
man2b1 T1 R	GTGTCTTATCCAGCATGCAGGTGTTC
man2b1 T2 F	TGTAAAACGACGGCCAGTCTCAAGAAAATGCAGGTTTGC
man2b1 T2 R	GTGTCTTAGAACACGCCTCCATCTTTG
marveld2a T1 F	tgtaaaacgacggccagtTCCTCCATAGAAGCCACCAG
marveld2a T1 R	gtgtcttCTCCCGTAAAGAGCGTGAAG
marveld2a T2 F	tgtaaaacgacggccagtACACTTGAGCGCAAGCAAAT
marveld2a T2 R	gtgtcttTTAGCGCCGGTACAGAAAAC
marveld2b T1 F	tgtaaaacgacggccagtGGTGGCCAATCACAGAGTGT
marveld2b T1 R	gtgtcttGACGATGGCTCCAACAAGAT
marveld2b T2 F	tgtaaaacgacggccagtAAGTGTCTCAGTGCCCATCC
marveld2b T2 R	gtgtcttGAAAAGGGGTGAGGGGAATA
mgat1b T1 F	TGTAAAACGACGGCCAGTTCGATCTTTTCATCCTTCGTG
mgat1b T1 R	GTGTCTTCATGGTTCGCAAGAAAGGAT
mgat1b T2 F	TGTAAAACGACGGCCAGTTTCGTCGTCCACGAGAAATA
mgat1b T2 R	GTGTCTTGCGTCAGTTTGGGTCAGTTT
mgat2 T1 F	TGTAAAACGACGGCCAGTGGGTGGTGTTGTCTGCTTCT
mgat2 T1 R	GTGTCTTCTGGAGCAGACCTTTTCGTC
mgat2 T2 F	TGTAAAACGACGGCCAGTGGTGGACTTCCACGCTTTTA
mgat2 T2 R	GTGTCTTCAGACTCCTTCGGCCACTAC
mgat3 T1 F	TGTAAAACGACGGCCAGTCGTGGAATTTTTCTGGGTGT
mgat3 T1 R	GTGTCTTCTTGCATCTCAAGGCAGGTT
mgat3 T2 F	TGTAAAACGACGGCCAGTAGGGGATGTCATCAGTTGGA
mgat3 T2 R	GTGTCTTTCAACTCCAGTCACCCAGTG
mgat4a T1 F	TGTAAAACGACGGCCAGTCAGTAAGCGGTTTGGCTCAC
mgat4a T1 R	GTGTCTTGCATTGTTTGTTGCTTGCAT
mgat4a T2 F	TGTAAAACGACGGCCAGTTGTAGGCCTTCACACACAGG
mgat4a T2 R	GTGTCTTTGTCTCATATTCGCCTGGTG
mgat4b T1 F	TGTAAAACGACGGCCAGTGGGTCTTGCATTCAGGCTAT
mgat4b T1 R	GTGTCTTGAAGCATGTTGAGGGGAAAA
mgat4b T2 F	TGTAAAACGACGGCCAGTCAGGCCTGGAGGAGAATGTA
mgat4b T2 R	GTGTCTTGCTGAAGTTGTGGAACGTGA
mgat4c T1 F	TGTAAAACGACGGCCAGTCATTGACTGGCACCTTGTGT
mgat4c T1 R	GTGTCTTTGGAGCTTTGGAAGTTGGAG
mgat4c T2 F	TGTAAAACGACGGCCAGTTTGCCCCAAAAGTACTCGTC
mgat4c T2 R	GTGTCTTTCACGAGACCTTCCCAGACT
mgat5 T1 F	TGTAAAACGACGGCCAGTAGAGATTGTCCAAGCTGGAGTC
mgat5 T1 R	GTGTCTTACAGACGTGCTGAAGTGCTC
mgat5 T2 F	TGTAAAACGACGGCCAGTTTCCAGATCCTGGTTCACCT
mgat5 T2 R	GTGTCTTGAAATTCGGATGTCGTGTCC
mgea5 T1 F	TGTAAAACGACGGCCAGTACCATGTGGCTAACGTGTGA
mgea5 T1 R	GTGTCTTTGGGACAACATCCATGCTAA
mgea5 T2 F	TGTAAAACGACGGCCAGTCCCATGCAAGCACAATTAAA
mgea5 T2 R	GTGTCTTCGCATGTGTGTGTGGAATTT
msrb3 T1 F	tgtaaaacgacggccagtTTGCATTTGTGTTCAATTTCC
msrb3 T1 R	gtgtcttAGGATGGCTGTCCGTCTTCT
msrb3 T2 F	tgtaaaacgacggccagtAAAGACGTGCCACTCTAAACAA
msrb3 T2 R	gtgtcttTTGAAGCGAGCATTTATTGG
myh9a T1 F	tgtaaaacgacggccagtCCCATAATCCTGAAGGCATC
myh9a T1 R	gtgtcttCCAACCCTAGCTTGCAGATT
myh9a T2 F	tgtaaaacgacggccagtGCTTTGTTGATGCGCATGAC
myh9a T2 R	gtgtcttTCCCTTTTATCAGCTGCCCA
MYH9B T1 F	tgtaaaacgacggccagtTGGAACATGTATTTACACAGGAA
MYH9B T1 R	gtgtcttTAAACTGCTGCGAATGATCC
MYH9B T2 F	tgtaaaacgacggccagtCGCTTGGTCTTATCCAGAGC
MYH9B T2 R	gtgtcttAACCATTCTCCATCCCCTTC
Myo15aa.B T1 F	tgtaaaacgacggccagtTTCAGCTGTGGGAGAATATGG
Myo15aa.B T1 R	gtgtcttGGGATGCAGATCAACCAAAG
Myo15aa.B T2 F	tgtaaaacgacggccagtCAACAGATGCCACTTCCTGA
Myo15aa.B T2 R	gtgtcttAAGAGTGATGGCGAGGACTT
myo15ab T1 F	tgtaaaacgacggccagtGCTTGATTTTTCATAGCATTTGAT
myo15ab T1 R	gtgtcttTCAGGAAATCATGAGAGGGTTA
myo15ab T2 F	tgtaaaacgacggccagtTGATCAGATGATGGTCAGAAGTG
myo15ab T2 R	gtgtcttCCTCCACTCTGTGGAAAAAGA
myo3a T1 F	tgtaaaacgacggccagtTCACTTGCACATGACATTCG
myo3a T1 R	gtgtcttGCAGTTTGGTAATGACCGTGT
myo3a T2 F	tgtaaaacgacggccagtCTGCCATGTTGGAAATGTTG
myo3a T2 R	gtgtcttGAAGAAAAATGCTGCAATGGA
myo6a T1 F	tgtaaaacgacggccagtGTAAGCCCTGCTGCTTGTGT
myo6a T1 R	gtgtcttCTGCAGATTGAGGACTGCTG
myo6a T2 F	tgtaaaacgacggccagtTGGGTTAAATGCAGAGCACA
myo6a T2 R	gtgtcttCACACACACACGAACTCACG
myo7aa T1 F	tgtaaaacgacggccagtCGTCAGCTGATATAACACAGCA
myo7aa T1 R	gtgtcttTTTCCAGGAACACTGGATCTC
myo7aa T2 F	tgtaaaacgacggccagtACCCTCGTAGCGGAGGTTG
myo7aa T2 R	gtgtcttTCTCCCCGATGATAGTCCAG
ogt.1 T1 F	TGTAAAACGACGGCCAGTGCAGCTGCCAGGTTAATGTA
ogt.1 T1 R	GTGTCTTGCTTGATATGCAGGTCAGCTC
ogt.1 T2 F	TGTAAAACGACGGCCAGTAGATACCCAGCAACGGCTCT
ogt.1 T2 R	GTGTCTTTAACCTGGGCTGTGTGTTCA
ogt.2 T1 F	TGTAAAACGACGGCCAGTAAGCTCCAGTTCAGGACACC
ogt.2 T1 R	GTGTCTTAATTTAGCACTCTGGCCACCA
pcdh15b T1 F	tgtaaaacgacggccagtGCTGGGAAAGTAGGCGATAAG
pcdh15b T1 R	gtgtcttGGAGTTGGACAGGCATCAGT
pcdh15b T2 F	tgtaaaacgacggccagtAAGAAAGAAAGAACGAAAGAAAGAAA
pcdh15b T2 R	gtgtcttGATGGATGGCCATTTGAGAG
pou4f3 T1 F	tgtaaaacgacggccagtAGGGTGCTTGGGAATGTTCT
pou4f3 T1 R	gtgtcttTGAGATATGGGCACTGTGGA
pou4f3 T2 F	tgtaaaacgacggccagtATCGCTCGAGGCATATTTTG
pou4f3 T2 R	gtgtcttCAGTCTGAGGCGATGTGAAA
prdx2 T1 F	tgtaaaacgacggccagtGCCAGAAGTTGCTCAAGTGG
prdx2 T1 R	gtgtcttGCTGCAATGATGCACTGAAA
prdx2 T2 F	tgtaaaacgacggccagtGCCAACTCTTTCTGGATGTCTC
prdx2 T2 R	gtgtcttCACCATGCTAGATGGCTGAA
prdx3 T1 F	tgtaaaacgacggccagtTTGCATTGCTGCACAAAAAG
prdx3 T1 R	gtgtcttGACCAGGTATTTGCCCTTGA
prdx3 T2 F	tgtaaaacgacggccagtTCTCCTTATCTGCCCACCTG
prdx3 T2 R	gtgtcttGTCACGTGCACTGTTTGGAC
prdx4 T1 F	tgtaaaacgacggccagtCAGTCTCAAAACCAGCACCA
prdx4 T1 R	gtgtcttGAGGGTTTTGCATCTGAACTC
prdx4 T2 F	tgtaaaacgacggccagtTACTCAGCGAGTCGGTTGTG
prdx4 T2 R	gtgtcttAAAATAAACCACCGCAAGCA
prps1a T1 F	TGTAAAACGACGGCCAGTAGGAGAGAGTGTCCGTGGAG
prps1a T1 R	GTGTCTTTAAGCAAGCTGTTCCCCTCA
prps1a T2 F	TGTAAAACGACGGCCAGTTTCGAGGAAGTGGACATCTG
prps1a T2 R	GTGTCTTCTCATGTTTGGAGGCCAAGT
prps1b T1 F	tgtaaaacgacggccagtCACGAGTTTTAACCCCACCT
prps1b T1 R	gtgtcttTGGAGTACATATTCTGCGTAATGTT
prps1b T2 F	tgtaaaacgacggccagtTGGCTATAGACATTACCAGCACA
prps1b T2 R	gtgtcttTTCTGCAGTGTGGAGATTGG
ptprn2 T1 F	tgtaaaacgacggccagtTCATGTGCAACTTATAGTCAAGTTAAT
ptprn2 T1 R	gtgtcttTGAAGAACACTTCGCAAACG
ptprn2 T2 F	tgtaaaacgacggccagtCGGAGTCCCTCTTGCTGA
ptprn2 T2 R	gtgtcttTACTGAGGGCCTCCTTACGA
ptprna T1 F	tgtaaaacgacggccagtAGATGTTTGATCTCCACTATTAGATTT
ptprna T1 R	gtgtcttTTGTAGGTATGAGTAAGGGTCCA
ptprna T2 F	tgtaaaacgacggccagtGTTGGTATTGAGGATGCTTGC
ptprna T2 R	gtgtcttCGGGTGCCACTTAATACCTG
ptprnb T1 F	tgtaaaacgacggccagtTCACATGAATAAGCAACATTTCTG
ptprnb T1 R	gtgtcttAGACAGAGGGGTGAGGGAGT
ptprnb T2 F	tgtaaaacgacggccagtTAATGGCTTGTTGTCGTGGT
ptprnb T2 R	gtgtcttGCAACCCTGCATTTTCAGAT
ptprq T1 F	tgtaaaacgacggccagtTGAATGCATCACAAACTGCTT
ptprq T1 R	gtgtcttGTGAAGCTGGGGTCTGGATA
ptprq T2 F	tgtaaaacgacggccagtGAAACCAAAGTGGTGTGTGC
ptprq T2 R	gtgtcttGCGGAGACCTCAAACACATAA
sesn1 T1 F	TGTAAAACGACGGCCAGTTCAAAAACCCCAGTGGTAGC
sesn1 T1 R	GTGTCTTTGGGCCAGGATCTTATTGAG
sesn1 T2 F	TGTAAAACGACGGCCAGTGGTGAGGTGGAAGTGCTCAT
sesn1 T2 R	GTGTCTTTGAGGAAAACAGGCTTGGAG
slc26A4.C T1 F	tgtaaaacgacggccagtTCCTTTCCCTGTCACCTGTC
slc26A4.C T1 R	gtgtcttCCAACCAGCACCGTCATAGT
slc26A4.C T2 F	tgtaaaacgacggccagtAAGGCACTGCTGATGCTTAT
slc26A4.C T2 R	gtgtcttACCTGACTCTTTCCTCCTGT
SLC26A5 T2 F	tgtaaaacgacggccagtTTCCTTTTCAATCTGGACCAA
SLC26A5 T2 R	gtgtcttCCTTCAGATAATGACCTCACCAC
SLC26A5.B T1 F	tgtaaaacgacggccagtATTAATATGATGCTCAAAGGAATGG
SLC26A5.B T1 R	gtgtcttTTCAGGCACATTTGCTGTAATC
smarca4 T1 F	TGTAAAACGACGGCCAGTAAAGGCATTCCTGAAGACCA
smarca4 T1 R	GTGTCTTTCCCCAAAATGAAAAAGGAA
smarca4 T2 F	TGTAAAACGACGGCCAGTAAAACAATGGTAGGCGAAACA
smarca4 T2 R	GTGTCTTTACTGACCTTCAGGCCAAGG
smpx T1 F	tgtaaaacgacggccagtACAGGACCGAGTTTGGACAC
smpx T1 R	gtgtcttCTTCTCACCCTTCAGCGTCT
smpx T2 F	tgtaaaacgacggccagtCGGAAATGGTGTGAATTTGA
smpx T2 R	gtgtcttTGGTGGGACATGAAAGTGAG
tecta T1 F	tgtaaaacgacggccagtCCACGTATGCCATTATGCAC
tecta T1 R	gtgtcttCATGATCTCTGGGGCTAGGA
tecta T2 F	tgtaaaacgacggccagtAGGAACCCATCAAAGGTGTG
tecta T2 R	gtgtcttAGGCCGATTTTACAGACGTG
tjp2a T1 F	tgtaaaacgacggccagtATACCTCCTGCGCTCATTGT
tjp2a T1 R	gtgtcttCAGTCCAGACCCCCGTTAT
tjp2a T2 F	tgtaaaacgacggccagtCCATGTTATTCACCTGGAGGA
tjp2a T2 R	gtgtcttGCTTTGTGAAGGGTGAAAGC
tjp2b T1 F	tgtaaaacgacggccagtGATAGATCCCCCAGCACTGA
tjp2b T1 R	gtgtcttTCCCTGCTGTGACTCCTGAT
tjp2b T2 F	tgtaaaacgacggccagtCAGAAGCTGTCGCGTCATAA
tjp2b T2 R	gtgtcttTGCCAAAGGATATCAAACCA
Tks5a T1 F	tgtaaaacgacggccagtGTTACGCTAGGTTGCGGAGT
Tks5a T1 R	gtgtcttTGTAAGGGACTCACCGCTTT
Tks5a T2 F	tgtaaaacgacggccagtGACCTTTCCCCAAGAAAGAA
Tks5a T2 R	gtgtcttTTCTCCTGTAGGGTGGCACT
tmc1 T1 F	tgtaaaacgacggccagtTGGGTCTCACCTCATTCCTC
tmc1 T1 R	gtgtcttCGCCTCTCTTGGCTTCATAA
tmc1 T2 F	tgtaaaacgacggccagtCTCAAGTACCTGTCCCACCA
tmc1 T2 R	gtgtcttTCTCATCTTCAGTCTGTCTTTTGT
tmie T1 F	tgtaaaacgacggccagtGCAGTTTCCAGCCTCAGTGT
tmie T1 R	gtgtcttATGGAGAAAATGCCCACAAC
tmie T2 F	tgtaaaacgacggccagtTGTTGACCTTTCCCTCTGCT
tmie T2 R	gtgtcttAGGCAGAAAGAGCAGCAAGT
tmprss3a T1 F	tgtaaaacgacggccagtCAACATGACATTCTGATGAAGTGA
tmprss3a T1 R	gtgtcttAGCATCAGATATATCCCAACCAAT
tmprss3a T2 F	tgtaaaacgacggccagtTATTTTAGTTGGACTGAGCTGTGC
tmprss3a T2 R	gtgtcttCTCCATCATTAAGCACCTGAAGTA
ush1c T1 F	tgtaaaacgacggccagtTCCTTCTACTGCTCCTCCTTTAGA
ush1c T1 R	gtgtcttGCATCAGATCCCATTAATCTGTTT
ush1c T2 F	tgtaaaacgacggccagtTGGCTCATAGGTCTGTGTTTG
ush1c T2 R	gtgtcttTGACTGGCGTTCTTTCTCCT
wfs1b T1 F	tgtaaaacgacggccagtTCTGGACACAACATTCATCCA
wfs1b T1 R	gtgtcttTTGACCGGATGAAACAATCA
wfs1b T2 F	tgtaaaacgacggccagtTGTGCTTTGGCAGAGACTGA
wfs1b T2 R	gtgtcttTGCAAGTTTTAACATCCAAACA

## Sheet: Supplemental File 3
Supplementary File 3: List of Barcoded Primers
WellPosition	Barcoded M13 primers
A1	AAAAAAtgtaaaacgacggccagt
A2	AAAATTtgtaaaacgacggccagt
A3	AAAAGGtgtaaaacgacggccagt
A4	AAAACCtgtaaaacgacggccagt
A5	AAATATtgtaaaacgacggccagt
A6	AAATTAtgtaaaacgacggccagt
A7	AAATGCtgtaaaacgacggccagt
A8	AAATCGtgtaaaacgacggccagt
A9	AAAGAGtgtaaaacgacggccagt
A10	AAAGTCtgtaaaacgacggccagt
A11	AAAGGAtgtaaaacgacggccagt
A12	AAAGCTtgtaaaacgacggccagt
B1	AAACACtgtaaaacgacggccagt
B2	AAACTGtgtaaaacgacggccagt
B3	AAACGTtgtaaaacgacggccagt
B4	AAACCAtgtaaaacgacggccagt
B5	AATAATtgtaaaacgacggccagt
B6	AATATAtgtaaaacgacggccagt
B7	AATAGCtgtaaaacgacggccagt
B8	AATACGtgtaaaacgacggccagt
B9	AATTAAtgtaaaacgacggccagt
B10	AATTTTtgtaaaacgacggccagt
B11	AATTGGtgtaaaacgacggccagt
B12	AATTCCtgtaaaacgacggccagt
C1	AATGACtgtaaaacgacggccagt
C2	AATGTGtgtaaaacgacggccagt
C3	AATGGTtgtaaaacgacggccagt
C4	AATGCAtgtaaaacgacggccagt
C5	AATCAGtgtaaaacgacggccagt
C6	AATCTCtgtaaaacgacggccagt
C7	AATCGAtgtaaaacgacggccagt
C8	AATCCTtgtaaaacgacggccagt
C9	AAGAAGtgtaaaacgacggccagt
C10	AAGATCtgtaaaacgacggccagt
C11	AAGAGAtgtaaaacgacggccagt
C12	AAGACTtgtaaaacgacggccagt
D1	AAGTACtgtaaaacgacggccagt
D2	AAGTTGtgtaaaacgacggccagt
D3	AAGTGTtgtaaaacgacggccagt
D4	AAGTCAtgtaaaacgacggccagt
D5	AAGGAAtgtaaaacgacggccagt
D6	AAGGTTtgtaaaacgacggccagt
D7	AAGGGGtgtaaaacgacggccagt
D8	AAGGCCtgtaaaacgacggccagt
D9	AAGCATtgtaaaacgacggccagt
D10	AAGCTAtgtaaaacgacggccagt
D11	AAGCGCtgtaaaacgacggccagt
D12	AAGCCGtgtaaaacgacggccagt
E1	AACAACtgtaaaacgacggccagt
E2	AACATGtgtaaaacgacggccagt
E3	AACAGTtgtaaaacgacggccagt
E4	AACACAtgtaaaacgacggccagt
E5	AACTAGtgtaaaacgacggccagt
E6	AACTTCtgtaaaacgacggccagt
E7	AACTGAtgtaaaacgacggccagt
E8	AACTCTtgtaaaacgacggccagt
E9	AACGATtgtaaaacgacggccagt
E10	AACGTAtgtaaaacgacggccagt
E11	AACGGCtgtaaaacgacggccagt
E12	AACGCGtgtaaaacgacggccagt
F1	AACCAAtgtaaaacgacggccagt
F2	AACCTTtgtaaaacgacggccagt
F3	AACCGGtgtaaaacgacggccagt
F4	AACCCCtgtaaaacgacggccagt
F5	ATAAATtgtaaaacgacggccagt
F6	ATAATAtgtaaaacgacggccagt
F7	ATAAGCtgtaaaacgacggccagt
F8	ATAACGtgtaaaacgacggccagt
F9	ATATAAtgtaaaacgacggccagt
F10	ATATTTtgtaaaacgacggccagt
F11	ATATGGtgtaaaacgacggccagt
F12	ATATCCtgtaaaacgacggccagt
G1	ATAGACtgtaaaacgacggccagt
G2	ATAGTGtgtaaaacgacggccagt
G3	ATAGGTtgtaaaacgacggccagt
G4	ATAGCAtgtaaaacgacggccagt
G5	ATACAGtgtaaaacgacggccagt
G6	ATACTCtgtaaaacgacggccagt
G7	ATACGAtgtaaaacgacggccagt
G8	ATACCTtgtaaaacgacggccagt
G9	ATTAAAtgtaaaacgacggccagt
G10	ATTATTtgtaaaacgacggccagt
G11	ATTAGGtgtaaaacgacggccagt
G12	ATTACCtgtaaaacgacggccagt
H1	ATTTATtgtaaaacgacggccagt
H2	ATTTTAtgtaaaacgacggccagt
H3	ATTTGCtgtaaaacgacggccagt
H4	ATTTCGtgtaaaacgacggccagt
H5	ATTGAGtgtaaaacgacggccagt
H6	ATTGTCtgtaaaacgacggccagt
H7	ATTGGAtgtaaaacgacggccagt
H8	ATTGCTtgtaaaacgacggccagt
H9	ATTCACtgtaaaacgacggccagt
H10	ATTCTGtgtaaaacgacggccagt
H11	ATTCGTtgtaaaacgacggccagt
H12	ATTCCAtgtaaaacgacggccagt
