# Supplementary material for: High-throughput gene targeting and phenotyping in zebrafish using CRISPR/Cas9
Source: HighWire-hosted journal article supplement (doi:10.1101/gr.186379.114), 2015-06-05
Supplement: Supplemental_Tables_1-4.xlsx [file Supplemental_Tables_1-4.xlsx]

## Sheet: Supplementary Table 1
Supplementary Table 1 : Summary of targeted site with their mutagenesis activities
Gene Name	Target Sequence	% of positive founders	% mutant F1's from positive founders	Absolute Germline Transmission	Extra G at 5'	PAM site	GC%
cav1-T1	ggACGCTCACTCGCCGTTTATC	0	0	0	2	AGG	55	Column A	Gene Name
cav1-T2	ggTGACTAGCGGATACAAGGAC	33.33	25	8.45	2	GGG	50	Column B	Target Sequence
cav3-T1	GGACCAGTACAACACTAACG	100	73.24	73.24		AGG	50	Column C	% of positive founders
cav3-T2	ggCCCACAGTATGGACGGCGTG	88.89	56.25	50.7	2	TGG	65	Column D	% mutant F1's from positive founders
cdh2-T1	ggATTTCCGGATAGACGCCGAT	0	0	0	2	GGG	50	Column E	Absolute germline transmission rate calculated from total embryos screened
cdh2-T2	ggCGCTACAGTGTGACCGGACC	20	52.38	14.47	2	AGG	65	Column F	Number of extra guanosines added to the target sites
cdh23-T1	GGTCACAGTGACGATTCCTC	100	61.54	61.54		TGG	55	Column G	PAM site
cdh23-T2	ggCGAGCCGCTGATTTTCGGTG	0	0	0	2	TGG	60	Column H	GC % of 20 mer target
coch-T1	GGAATCATAGGTCTGTCTGG	77.78	47.73	33.33		TGG	50
col11A2-T1	GGAAATGGTAAAGACACTAA	55.56	45.71	28.57		TGG	35	Median germline positive %	57.735
col11A2-T2	GGACAGAGCGCTGGAGAGAA	66.67	59.52	44.64		AGG	60
crym-T1	GGACCACAGATCTCACAGGC	80	75	42.86		TGG	60	1st Quartile	20
crym-T2	GGGGTGAAAAAGTAAGACGG	0	0	0		TGG	50	2nd Quartile	57.735
ctnnb1-T1	GGTCAACCTCATCAACTACC	14.29	10	1.43		AGG	50	3rd Quartile	85.71
ctnnb1-T2	GGCAGTCTGTCGTGATGGCG	0	0	0		AGG	65	4th Quartile	100
cx30.3-T1	GGGAGCACTTTATGCTCAGC	100	9.52	9.52		TGG	55
cx35.4-T1	GGTCATGGTTTATGTCGTAG	71.43	45.71	38.1		CGG	45
cx35.4-T2	GGTAGAAGCTGTCGTAGATG	0	0	0		TGG	50
dfna5-T1	GGAAGTGCTGTAGCAGAACT	33.33	15	4.76		TGG	50
dfna5-T2	GGAGGTGTTGGCGGTAGTGA	83.33	77.78	66.67		AGG	60
espn-T1	GGTTGCTCAAAAGTGAGGAG	0	0	0		GGG	50
espn-T2	GGATCTGGGCATACGGGATC	71.43	55.56	34.09		AGG	60
espnl-T1	GGCTGCCAGGTTTGGCCATG	100	87.8	87.8		CGG	65
espnl-T2	GGCTCCATTCTTATCCTGAC	83.33	57.14	47.62		AGG	50
eya4-T1	GGTGGAGTCGTTTGCGAATA	83.33	50	41.46		GGG	50
eya4-T2	GGCTGTCTGTCCGGGCTGAG	100	84.62	84.62		GGG	70
fut8-T1	GGAAGGTGGAGAATGGTGTG	66.67	53.57	35.71		AGG	55
fut8-T2	ggCACGCAGCGGACGCTCATAC	10	14.29	1.43	2	TGG	65
gpsm2-T1	GGCCAAAGCCAGCGGAAACC	100	7.14	7.14		TGG	65
grhl2a-T1	GGCACAGTGCCTGCCGAGGA	12.5	28.57	3.57		CGG	70
grhl2a-T2	GGGATGACGAAGGCCCTTGT	100	87.5	87.5		TGG	60
grhl2b-T1	GGATCACCAGGACAATAAAC	85.71	74.07	63.49		GGG	45
grhl2b-T2	GGCCTCCTCGTTCAGGTCCC	71.43	65.31	50.79		AGG	70
hgfa-T1	GGGTCAGGTGTCAACTACAA	100	72.73	72.73		GGG	50
hgfa-T2	GGGGTCAAGGAGAGGGCTAC	80	39.47	33.33		AGG	65
hgfb-T1	GGTGTGAGCATAAATGGCAG	83.33	48.15	41.94		AGG	50
hgfb-T2	GCCACGTTCACAAAAATGGC	71.43	48.57	40.48		TGG	50
hif1ab-T1	GGTCATGTTCGTGTGCACGA	100	45.45	45.45		GGG	55
hif1ab-T2	GGCTGTTGAGAAAGAAAGTG	62.5	22.86	14.55		AGG	45
hspa5-T1	GGGCGACTCTTCTGTGCAGC	16.67	28.57	4.76		AGG	65
hspa5-T2	GGACGGAGAGAAAAACATCC	50	33.33	31.82		TGG	50
hspe-T1	gGCAGGCTACCGTGGTAGCAG	60	50	30	1	TGG	66
hspe-T2	ggTCCTGGACCCACTGCTACCA	60	50	30	2	CGG	64
hyou1-T1	ggGACGGCAGACAACCCACAGG	60	54.17	32.5	2	TGG	65
hyou1-T2	gGAGGGACAATCTGCGTGCCA	0	0	0	1	TGG	60
igf2bp2b-T1	GGAAGACCCCAGGTCCCGCG	100	35.59	35.59		AGG	75
igf2bp2b-T2	ggCCCCAGCATTCTCTTTACGA	10	6.25	0.8	2	TGG	50
igfbp7-T1	GGAGTCCCGCAGCGTCCCGG	90	48.21	45.76		AGG	80
igfbp7-T2	ggCCGGAGATCGTGACTCCTCC	0	0	0	2	AGG	65
ildr1a-T1	GGGCACTAATGAGGCGGTGC	33.3	100	33		AGG	65
ildr1a-T2	GGCAGCAGCAGATGCAGAAG	42.8	25	6		AGG	60
ildr1b-T1	GGCAGCTCTGAACATGAAGC	33.33	100	13.64		AGG	55
ildr1b-T2	gGACAGCAGCAGACCCCGAAC	40	25	14.29	1	AGG	65
junba-T1	gGACTTCTACACGGCGGCGAC	0	0	0	1	CGG	65
junba-T2	ggTGATGACGCCGTTACCGTTC	0	0	0	2	TGG	55
junbb-T1	gGAGGCTCCGATAGGGCGGCT	90.91	44.3	40.7	1	CGG	70
junbb-T2	GGGTTACGGTCACAACGACG	45.45	20.51	9.3		CGG	60
Kars-T1	GGTCATGCTGATTCGCCTGA	33.33	28.57	9.52		AGG	55
krt15-T1	GGTAGATCTGAATCATGTGA	80	50	40		TGG	40
krt15-T2	GGTGCTGGAGGAGGCTTCGG	20	57.14	11.43		AGG	70
lhfpl5a-T1	GGCCTGTTCCACTACTGCAT	0	0	0		TGG	55
lhfpl5a-T2	GGTAGATCTTGGCAGCCTCT	100	33.33	33.33		TGG	55
loxhd1a-T1	GGTAAGCTGTTCCTGGAAGG	100	68.18	68.18		CGG	55
loxhd1a-T2	GGGCCGTGAGTTAGTGCCTG	100	38.1	38.1		TGG	65
loxhd1b-T1	GGATGTGAGCGGCAGCGGGA	50	42.86	21.43		CGG	70
loxhd1b-T2	GGCTGATGGGAAGACGGAGG	75	48	33.33		TGG	65
man1a1-T1	GGAGACAGGCCGCAGCTCGT	100	63.27	63.27		TGG	70
man1a1-T2	GGTCGGCAGAAACTGGCCAT	85.71	50	42.86		GGG	60
man1b1-T1	GGTCTCAGGCCCATTCCTCC	40	28.57	11.76		TGG	65
man1b1-T2	GGAAGAGAGTGTCGCCACTC	40	30.77	23.53		AGG	60
man2a-T1	GGTAGAGAACGGTCAGCTGG	75	38.1	28.57		AGG	60
man2a-T2	GGACAGCTAATTCTTCCTCC	87.5	73.47	64.29		TGG	50
man2b-T1	GGTTCTGCTGTCTCCACCAG	50	25	12.5		CGG	60
man2b-T2	GGCTATGACGGCTTCTTCTT	75	42.86	32.14		TGG	50
marveld2a-T1	gGCTGGACTTTTACGTATTCT	16.67	14.29	4.76	1	CGG	40
marveld2a-T2	GGTTTAGGAGTGTGTCCCGC	50	58.33	33.33		TGG	60
marveld2b-T1	GGCCCAATGCAGGATTTTGT	33.33	35.71	11.9		CGG	50
marveld2b-T2	GGTTTGGGGATGTGGCCAGC	0	0	0		AGG	65
mgat1b-T1	GGCCGGTGAAGTGATCAGAT	100	37.14	37.14		TGG	55
mgat1b-T2	GGTGGAAGCTTGAAAGGCTC	40	28.57	11.43		GGG	55
mgat2-T1	GGATTCGCCGTCTGGAATAG	83.33	48.48	41.03		TGG	55
mgat2-T2	GGTGGTAAAAGTCTGGAGCG	100	82.05	82.05		AGG	55
mgat3-T1	GGTGTCCCTGTCGTCAGGGT	83.33	40	33.33		TGG	65
mgat3-T2	GGTCTTCCTGGTGTGCTTAC	66.67	46.43	30.95		TGG	55
mgat4a-T1	GGCTCACAGGAAGCCCCTTC	100	77.55	77.55		AGG	65
mgat4a-T2	GCGAATGAAGCGTCTCTGAC	71.43	37.14	26.53		AGG	55
mgat4b-T1	GGAGTGCAGACGGTCTCTCA	88.89	76.79	68.25		GGG	60
mgat4b-T2	GGAGAGCAGCCTTCAGCCGG	77.78	82.5	52.38		CGG	70
mgat4c-T1	ggAAACATTGAGGTTCACGATG	20	14.29	2.86	2	TGG	40
mgat4c-T2	ggGCTACTATTCCTCGTATAAG	20	28.57	5.71	2	GGG	40
mgat5-T0	GGACTCATTCGGGACGGAGC	50	100	48.94		CGG	65
mgat5-T1	GGGTTGACTGGGTTTGGTCC	50	46.43	23.21		GGG	60
mgat5-T2	GGCTTGTTGACGAAGGAGTC	37.5	23.81	8.93		TGG	55
mgea5-T1	GGTCTACAGAACTCATTCCT	100	56.1	56.1		CGG	45
mgea5-T2	GGCCATGGACTATGGAACAA	0	0	0		AGG	50
MSrb3-T1	GGTGTAGTCAGTATTAGGAG	100	50	50		TGG	65
myh9a-T1	GGTACTTATTGTAGTCCTCT	100	61.29	61.29		AGG	40
myh9a-T2	GGGTCGTGATTTTGTTCAGA	0	0	0		AGG	45
myh9b-T1	gGCTGCAGGCAAACCCGATCC	0	0	0	1	TGG	65
myh9b-T2	GGAGCAGGCCGAGTTTGCAG	16.67	33.33	6.67		TGG	65
myo15aa-T1	GGTGGCACCTCAAGAGATTC	16.67	28.57	4.76		AGG	55
myo15aa-T2	GGACCCTGAAGATACCGCTC	100	50	50		TGG	60
myo15ab-T1	ggTCGGGTCTACCCCAGAAATG	50	34.62	18	2	AGG	55
myo15ab-T2	ggTAATTGTGGGATCACTGGAA	12.5	14.29	2.86	2	AGG	40
myo3a-T1	GGAATCACAGCCATAGAGCT	0	0	0		AGG	50
myo3a-T2	ggAGTGTTTACGGCATCTTAGC	50	42.86	22.22	2	TGG	45
myo6a-T1	GGCCATGAAGAAGATCGGTC	70	40	27.59		TGG	55
myo6a-T2	GGATCAAGTCTTCCCTGCTG	30	47.06	14.29		AGG	55
myo7aa-T1	GGAAGACATGATCCGGCTGG	100	82.35	82.35		GGG	60
myo7aa-T2	GGTGCTCATGTTCACAGATA	0	0	0		AGG	45
ogt1-T1	GGCAATGTTTACAAGGAGAG	75	27.78	20		AGG	45
ogt1-T2	gGACACTGGACCCAAACTTTT	25	16.67	4	1	TGG	45
ogt2-T1	GGCAACGTTCACAAGGAACG	12.5	16.67	1.96		AGG	55
ogt2-T2	GGTAACCTGCTTAAAGCGCT	50	50	23.53		TGG	50
pcdh15b-T1	ggGTGTTGTCGACCAAACTGCA	0	0	0	2	AGG	50
pcdh15b-T2	GGGGCTGTTGACATCGATGA	85.71	61.22	53.57		TGG	55
pou4f3-T1	GGCCCGCGCTGAAGCTCTGG	100	87.18	87.18		CGG	75
pou4f3-T2	GGGTTTGGTTCTGTAATCAA	50	63.16	30		CGG	40
prdx2-T1	GGAGTCCTGAAGGAGGACGA	100	73.68	73.68		GGG	60
prdx2-T2	GATCATTGCGTTCAGCGAGC	100	57.89	57.89		GGG	55
prdx3-T1	GGCTCCAGCGGTCACTCAAG	100	46.15	46.15		CGG	65
prdx3-T2	GGGTGTTGGTCCAGGCCAGG	100	54	54		TGG	70
prdx4-T1	GGTTTTCTTCTTCTACCCTC	20	33.33	5.88		TGG	45
prdx4-T2	ggAATGATCAGATACGGGCACG	33.33	23.81	8.47	2	CGG	50
prps1a-T1	GGATGCCGATGCAATCTTAC	71.43	20	13.95		AGG	50
prps1a-T2	GGCTCCAATCTCAGCCAAGC	42.86	23.81	10.64		TGG	60
prps1b-T1	GGCACCGATTTCTGCTAAGT	0	0	0		TGG	50
prps1b-T2	gGATGACTGCAGTGACTCTAG	25	64.29	16.67	1	TGG	50
ptprn2-T1	GGTCAGTGTCTGAGGTATCC	14.29	14.29	2.17		AGG	55
ptprn2-T2	GGAGGTTGTCTGGAAGCTCC	100	43.48	43.48		AGG	60
ptprna-T1	GGTACGGTTTGCATCCGGAG	60	61.9	37.14		CGG	60
ptprna-T2	GGCAGTCTTTTGAAGGGTTT	66.67	58.33	58.33		CGG	45
ptprnb-T1	GGAGGCTCTGTGCTCCTACC	57.14	53.57	30.61		AGG	65
ptprnb-T2	ggTGGCGATATACGCTGGCATC	85.71	50	45.65	2	CGG	55
ptprq-T1	GGTGAACGGGTCGGTTCCAC	66.67	53.57	35.71		CGG	65
ptprq-T2	GGATGGGCTCGGAGTCCCAC	0	0	0		GGG	70
sesn1-T1	GGTTGACCAGATACGTGCAC	60	33.33	20		TGG	55
sesn1-T2	ggAACGAGTGGCCATTTCCTCC	40	12.5	5	2	TGG	55
slc26a4-T1	GGAGGACACATTGATGGAGG	28.57	28.57	8.51		TGG	60
slc26a4-T2	GGCGTCAGCAACATTTTCGG	0	0	0		TGG	60
slc26a5-T1	GGCCCGTGATTCCAGAAGAG	50	50	27.72		TGG	55
slc26a5-T2	GGCGTCCCTACTTGTGCTAC	18.75	33.33	7.07		AGG	55
smpx-T1	GGGGCTCTGCGTCCTGGAGC	100	23.08	23.08		GGG	75
smpx-T2	GGCAGAGGCTTCTTCTCTTC	50	21.43	11.32		TGG	55
tectaT1	GGTGAGTCAGTTCACTCCAG	83.33	62.86	52.38		AGG	55
tectaT2	GGCAGATGACCTCATTATCC	33.33	14.29	4.76		AGG	50
tjp2A-T1	GGTTGTGTTCGCTGCGAAAG	50	44.44	12.12		CGG	55
tjp2A-T2	GGACAGTCCTGCCGAGGTGG	100	100	100		AGG	70
tjp2b-T1	GGAAGCTATAGCCGGGACCA	100	42.86	42.86		GGG	60
tjp2b-T2	GGAGGAGAGAGTAGAACCAC	100	45	45		AGG	55
tks5a-T1	GGTGCTGGAGCAGTACGTGG	50	56.25	56.25		TGG	65
tks5a-T2	GGAGATGTGGCGCTCAGGGG	66.67	69.23	45		TGG	70
tmc1-T1	GGAAGTTGGCCAGCACTCTG	58.33	67.35	39.29		AGG	60
tmc1-T2	GGCAGGCCAACTTGTACAAT	16.67	50	8.33		GGG	50
tmie-T1	GGCTTTTTCGGAGGGTCTGT	75	50	37.5		TGG	55
tmie-T2	GGAAACCTCAGCACTCCTGA	62.5	54.29	33.93		CGG	55
tmprss3a-T1	GGTTTCTGTTAGAGGCTCTT	37.5	23.81	9.8		TGG	45
tmprss3a-T2	GGGCATTTTGACTGTGAACA	37.5	33.33	14		TGG	45
ushc1-T1	GGTCTGATGGCATCAAACAA	100	63.27	63.27		AGG	45
ushc1-T2	GGTTGAAGCTCGACATGAGC	0	0	0		TGG	55
wfs1b-T1	GGAGGAAACGCTGATTGTCC	77.78	43.75	35.44		TGG	55
wfs1b-T2	GGTATTTCACCATCCATGGA	0	0	0		AGG	45

## Sheet: Supplementary Table 2
Supplementary Table 2: Totale number of unique alleles per gene
Gene Name	Total Number of unique alleles
espn	1
marveld2a	1
myo6a	1
lhfpl5a	2
marveld2b	2
tmprss3a	2
cx30.3	3
gpsm2	3
slc26a5	3
myo15aa	4
myo7aa	4
ptprn2	4
crym	5
kars	5
prdx4	5
cdh23	6
msrb3	6
prps1b	6
ptprna	6
myo15ab	7
prdx2	7
cx35.4	8
ptprnb	8
coch	9
ildr1bt1	9
myh9b	9
smpx	9
tjp2a	9
tjp2a	9
tjp2a	9
pcdh15b	11
prps1a	11
tks5	12
grhl2b	13
loxhd1b	13
prdx3	13
ptprna	13
ptprqt1	13
tmc1	13
man2b1	14
mgat1b	14
ushc1	14
pou4f3	15
tecta	15
tmie	16
grhl2a	17
loxhd1a	17
dfna5	18
hgfat1	19
mgat5	19
slc26a4	19
eya4	21
man1a1	21
col11a2	25
man2a1	25
tjp2b	26
espnl	27
mgat4b	34

## Sheet: Supplementary Table 3
Supplementary Table 3 Summary of germline mutagenesis data from multiplex gene targeting
Target	Number of positive founders	Mutagenesis rate %	Germline transmission rate (%)	Germline transmission rate (injected individually)
eya4	12	100	87.5	84.6
dfna5	10	83	39.7	66.67
espn	6	50	21.5	47.6
si:ch211-214j24.5	4	33	6.8	39
kars	4	33	7.4	9.52
fndc7	2	16.6	7.2	n/a
cx35.4	3	25	5.1	0
zgc: 77486	0	0	0	n/a
slc26a4	0	0	0	0
cdh23	0	0	0	0

## Sheet: Supplementary Table 4
Supplementary Table 4: Off-target analysis of CRISPR/Cas9-induced mutations
Gene Target	Sequence (5’-3’), PAM:green, mismatch:red	Number of matches	Off target detected
DFNA5	GGAGGTGTTGGCGGTAGTGAAGG	20/20	No
DFNA5-OT1	GGGGGTGGTGGTGGTAGTGAGGG	17/20	Yes
DFNA5-OT2	GCTCGTGGTGGTGGTAGTGAGGG	15/20	No
DFNA5-OT3	CTTCGTGCTGGCGGTGGTGATGG	14/20	No
DFNA5-OT4	TATCCTCTTTGCGGTAGTGAAAG	13/20	No
DFNA5-OT5	AGCTTCCATGGCGATAGTGACGG	2015-12-20	No
EYA4	GGCTGTCTGTCCGGGCTGAGGGG	20/20	No
EYA4-OT1	GGCGGACTGTCCGGGCTGATGAG	17/20	No
EYA4-OT2	CACTGACAGTCCGGGCGGAGGAG	15/20	No
EYA4-OT3	TGCCTCTCGTCCGGGCTGAGGGG	14/20	No
EYA4-OT4	CTCTACAGGTACGGGCTGAGGAG	13/20	No
EYA4-OT5	TGAATGTGGTCCGGACTGAGTGG	2015-12-20	No
FNDC7	GGTGGGGAGTAAAGGGGCAGTGG	20/20	No
FNDC7-OT1	GGAGGATGGAAAAGGGGCAGAGG	15/20	No
FNDC7-OT2	GAGGGTCTGTAAAGTGGCAGCGG	14/20	No
FNDC7-OT3	ATCCAAGAGTAAAGGGGTAGGGG	14/20	No
FNDC7-OT4	ACACAAAAGTAAAGGGGCGGGAG	13/20	No
FNDC7-OT5	CAAAACTTGTAAAGGTGCAGAGG	2015-12-20	No
Marveld2b	GGCCCAATGCAGGATTTTGTCGG	20/20	No
Marveld2b-OT1	TGCCTAGTGCAGGATTATGTGAG	16/20	No
Marveld2b-OT2	AGATCTCTGCAGGTTTTTGTCAG	15/20	No
Marveld2b-OT3	ATGTCAGGGCTGGATTTTGTAAG	14/20	No
Marveld2b-OT4	TTCGTTCCGGAGGATTTTGTTGG	2015-12-20	No
Marveld2b-OT5	TTGTGCTGGCAGTATTTTGTTGG	2015-12-20	No
PTPRN2	GGTCAGTGTCTGAGGTATCCAGG	20/20	No
PTPRN2-OT1	CTTCGGTCTCTGAAGTATCCCAG	15/20	No
PTPRN2-OT2	GATCCAGATCAGAGGTATCCAGG	14/20	No
PTPRN2-OT3	TTGCTGGATCTGACGTATCCAAG	13/20	No
PTPRN2-OT4	TTGTGGAATCTGACGTATCCCAG	2015-12-20	No
PTPRN2-OT5	ATCTGAAATCTGAGGTGTCCGGG	2015-11-20	No
dfna5-OT1
TCGTCTGGTTGTAACTGCTCTTCATCGCCCTCACTACCACCACCACCCCCACTCCCACCT- Reference
TCGTCTGGTTGTGACTGCTCTTCATCGCCCTCACT---ACCACCACCCCCACTCCCACCT -3bp
